# Supplementary material for: SMAD4 and TGFβ are architects of inverse genetic programs during fate determination of antiviral CTLs
Source: eLife. 2022 Aug 9;11:e76457. doi: 10.7554/eLife.76457 (PMC9402230; doi:10.7554/eLife.76457)
Supplement: Figure 3—source data 1. [file elife-76457-fig3-data1.xlsx]

## Sheet: gene_exp WT_VS_SMAD4_KO complet
test_id	gene_id	gene	locus	sample_1	sample_2	status	value_1	value_2	log2(fold_change)	test_stat	p_value	q_value	significant
H2-Aa	H2-Aa	H2-Aa	chr17:34282750-34287771	WT.replicate-1.bam	SKO.replicate-1.bam	OK	15.606	33.4403	1.09949	4.33869	0.00025	0.0457566	yes
Herc3	Herc3	Herc3	chr6:58833699-58920396	WT.replicate-1.bam	SKO.replicate-1.bam	OK	3.73507	7.64656	1.03368	3.4573	0.00025	0.0457566	yes
Il12rb2	Il12rb2	Il12rb2	chr6:67292017-67376137	WT.replicate-1.bam	SKO.replicate-1.bam	OK	9.19374	4.04003	-1.18629	-3.71482	0.00025	0.0457566	yes
Lrwd1	Lrwd1	Lrwd1	chr5:136123065-136136074	WT.replicate-1.bam	SKO.replicate-1.bam	OK	63.0924	33.2175	-0.925521	-4.65907	0.00025	0.0457566	yes
Pfkl	Pfkl	Pfkl	chr10:77986948-78009796	WT.replicate-1.bam	SKO.replicate-1.bam	OK	38.4719	21.1737	-0.86153	-4.13062	0.00025	0.0457566	yes
Tssc4	Tssc4	Tssc4	chr7:143069367-143071087	WT.replicate-1.bam	SKO.replicate-1.bam	OK	45.3749	22.6849	-1.00017	-3.65429	0.00025	0.0457566	yes
Chtf8	Chtf8	Chtf8	chr8:106883862-106893593	WT.replicate-2.bam	SKO.replicate-1.bam	OK	11.9219	5.77884	-1.04476	-3.86524	0.00025	0.0457566	yes
Golm1	Golm1	Golm1	chr13:59634995-59675784	WT.replicate-2.bam	SKO.replicate-1.bam	OK	19.8652	35.6011	0.841679	3.57607	0.00025	0.0457566	yes
Ipo4	Ipo4	Ipo4	chr14:55625628-55635678	WT.replicate-2.bam	SKO.replicate-1.bam	OK	13.4048	6.32781	-1.08297	-4.38039	0.00025	0.0457566	yes
Map1s	Map1s	Map1s	chr8:70905973-70917529	WT.replicate-2.bam	SKO.replicate-1.bam	OK	5.75416	1.99216	-1.53027	-5.83278	0.00025	0.0457566	yes
Pabpc4	Pabpc4	Pabpc4	chr4:123282910-123298835	WT.replicate-2.bam	SKO.replicate-1.bam	OK	11.7564	4.59411	-1.3556	-4.36921	0.00025	0.0457566	yes
Pdcd6ip	Pdcd6ip	Pdcd6ip	chr9:113651743-113708259	WT.replicate-2.bam	SKO.replicate-1.bam	OK	14.9236	8.07985	-0.885196	-3.58401	0.00025	0.0457566	yes
Pla2g16	Pla2g16	Pla2g16	chr19:7557458-7588545	WT.replicate-2.bam	SKO.replicate-1.bam	OK	10.1568	19.8454	0.966353	3.42544	0.00025	0.0457566	yes
Smpd5	Smpd5	Smpd5	chr15:76294433-76307245	WT.replicate-2.bam	SKO.replicate-1.bam	OK	2.98642	9.26185	1.63289	5.59151	0.00025	0.0457566	yes
Srebf2	Srebf2	Srebf2	chr15:82147268-82204960	WT.replicate-2.bam	SKO.replicate-1.bam	OK	9.78355	4.28449	-1.19123	-4.14485	0.00025	0.0457566	yes
Tbc1d10b	Tbc1d10b	Tbc1d10b	chr7:127197458-127208468	WT.replicate-2.bam	SKO.replicate-1.bam	OK	11.0087	5.28107	-1.05974	-4.37112	0.00025	0.0457566	yes
Tsc22d1	Tsc22d1	Tsc22d1	chr14:76415820-76507766	WT.replicate-2.bam	SKO.replicate-1.bam	OK	2.2391	8.19011	1.87097	4.60886	0.00025	0.0457566	yes
Ung	Ung	Ung	chr5:114130434-114139321	WT.replicate-2.bam	SKO.replicate-1.bam	OK	19.9528	8.95986	-1.15504	-3.87359	0.00025	0.0457566	yes
Agpat5	Agpat5	Agpat5	chr8:18846278-18884413	WT.replicate-3.bam	SKO.replicate-1.bam	OK	14.3202	7.38093	-0.956178	-3.41401	0.00025	0.0457566	yes
Ccl2	Ccl2	Ccl2	chr11:82035576-82037452	WT.replicate-3.bam	SKO.replicate-1.bam	OK	0	0.821665	inf	#NAME?	0.00025	0.0457566	yes
Cd52	Cd52	Cd52	chr4:134093537-134095073	WT.replicate-3.bam	SKO.replicate-1.bam	OK	5193.08	9234.4	0.830426	5.69625	0.00025	0.0457566	yes
Nfkbib	Nfkbib	Nfkbib	chr7:28756173-28766524	WT.replicate-3.bam	SKO.replicate-1.bam	OK	31.6699	15.6404	-1.01784	-3.72381	0.00025	0.0457566	yes
Pde4d	Pde4d	Pde4d	chr13:108654176-109955969	WT.replicate-3.bam	SKO.replicate-1.bam	OK	0.769935	2.08737	1.43888	3.99676	0.00025	0.0457566	yes
Prep	Prep	Prep	chr10:45067213-45158995	WT.replicate-3.bam	SKO.replicate-1.bam	OK	26.6964	13.0726	-1.0301	-4.40505	0.00025	0.0457566	yes
Psmb5	Psmb5	Psmb5	chr14:54614119-54617995	WT.replicate-3.bam	SKO.replicate-1.bam	OK	368.085	210.208	-0.808222	-3.53656	0.00025	0.0457566	yes
Rbm38	Rbm38	Rbm38	chr2:173021901-173034731	WT.replicate-3.bam	SKO.replicate-1.bam	OK	50.4703	25.611	-0.978672	-4.96946	0.00025	0.0457566	yes
Rnmtl1	Rnmtl1	Rnmtl1	chr11:76243735-76250622	WT.replicate-3.bam	SKO.replicate-1.bam	OK	13.8065	5.59096	-1.30418	-4.43571	0.00025	0.0457566	yes
Tsc22d1	Tsc22d1	Tsc22d1	chr14:76415820-76507766	WT.replicate-3.bam	SKO.replicate-1.bam	OK	2.85585	8.19011	1.51996	3.94522	0.00025	0.0457566	yes
Fmnl3	Fmnl3	Fmnl3	chr15:99317222-99370466	WT.replicate-1.bam	SKO.replicate-2.bam	OK	1.06663	3.20473	1.58714	4.42065	0.00025	0.0457566	yes
Il18rap	Il18rap	Il18rap	chr1:40515361-40549297	WT.replicate-1.bam	SKO.replicate-2.bam	OK	20.9635	10.7189	-0.967725	-3.38526	0.00025	0.0457566	yes
Rtp4	Rtp4	Rtp4	chr16:23609918-23614222	WT.replicate-1.bam	SKO.replicate-2.bam	OK	45.731	23.3011	-0.972772	-3.75618	0.00025	0.0457566	yes
Timp2	Timp2	Timp2	chr11:118301060-118355411	WT.replicate-1.bam	SKO.replicate-2.bam	OK	1.07545	3.65571	1.76522	4.73113	0.00025	0.0457566	yes
Thop1	Thop1	Thop1	chr10:81070082-81082360	WT.replicate-2.bam	SKO.replicate-2.bam	OK	8.24947	3.23047	-1.35256	-5.02681	0.00025	0.0457566	yes
Eomes	Eomes	Eomes	chr9:118478188-118486132	WT.replicate-3.bam	SKO.replicate-2.bam	OK	5.3133	1.6475	-1.68933	-4.53799	0.00025	0.0457566	yes
Fos	Fos	Fos	chr12:85473900-85477270	SKO.replicate-1.bam	SKO.replicate-2.bam	OK	47.3663	25.3649	-0.901028	-4.0632	0.00025	0.0457566	yes
Cd22	Cd22	Cd22	chr7:30865403-30880342	WT.replicate-2.bam	SKO.replicate-3.bam	OK	5.97973	2.5346	-1.23832	-3.85857	0.00025	0.0457566	yes
Cd86	Cd86	Cd86	chr16:36603868-36666077	WT.replicate-2.bam	SKO.replicate-3.bam	OK	1.82105	5.67655	1.64025	3.89061	0.00025	0.0457566	yes
Cdc34	Cdc34	Cdc34	chr10:79682194-79688398	WT.replicate-2.bam	SKO.replicate-3.bam	OK	56.0897	27.1854	-1.0449	-6.09905	0.00025	0.0457566	yes
Kdm2b	Kdm2b	Kdm2b	chr5:122870674-122989092	WT.replicate-2.bam	SKO.replicate-3.bam	OK	11.1604	5.21737	-1.09699	-3.84425	0.00025	0.0457566	yes
Srm	Srm	Srm	chr4:148591512-148594619	WT.replicate-2.bam	SKO.replicate-3.bam	OK	19.5809	8.05476	-1.28153	-5.23153	0.00025	0.0457566	yes
Actn2	Actn2	Actn2	chr13:12269426-12340732	WT.replicate-3.bam	SKO.replicate-3.bam	OK	0.749496	2.96087	1.98203	4.54982	0.00025	0.0457566	yes
Cd7	Cd7	Cd7	chr11:121036748-121039478	WT.replicate-3.bam	SKO.replicate-3.bam	OK	89.3109	172.71	0.951446	4.79502	0.00025	0.0457566	yes
Necap2	Necap2	Necap2	chr4:141066511-141078345	SKO.replicate-1.bam	SKO.replicate-3.bam	OK	41.0405	74.4024	0.858301	4.23603	0.00025	0.0457566	yes
Klf6	Klf6	Klf6	chr13:5861488-5870393	SKO.replicate-2.bam	SKO.replicate-3.bam	OK	34.7844	62.1228	0.836682	3.26031	0.00025	0.0457566	yes
Ifit3	Ifit3	Ifit3	chr19:34583528-34588982	WT.replicate-1.bam	WT.replicate-2.bam	OK	9.45335	3.84954	-1.29614	-3.72972	0.0002	0.0386492	yes
2310003H01Rik	2310003H01Rik	2310003H01Rik	chr11:120369561-120378746	WT.replicate-1.bam	SKO.replicate-1.bam	OK	7.38652	2.93311	-1.33246	-4.7331	0.0002	0.0386492	yes
Dnph1	Dnph1	Dnph1	chr17:46496788-46499618	WT.replicate-1.bam	SKO.replicate-1.bam	OK	31.6087	13.9893	-1.176	-4.94071	0.0002	0.0386492	yes
Gramd4	Gramd4	Gramd4	chr15:86057694-86137636	WT.replicate-1.bam	SKO.replicate-1.bam	OK	11.2929	5.40742	-1.0624	-3.80415	0.0002	0.0386492	yes
Rps10	Rps10	Rps10	chr17:27630428-27635242	WT.replicate-1.bam	SKO.replicate-1.bam	OK	2018.25	1160.03	-0.798947	-6.24181	0.0002	0.0386492	yes
Ruvbl1	Ruvbl1	Ruvbl1	chr6:88465422-88497566	WT.replicate-1.bam	SKO.replicate-1.bam	OK	109.787	60.1684	-0.867632	-4.1202	0.0002	0.0386492	yes
Arf5	Arf5	Arf5	chr6:28423639-28426499	WT.replicate-2.bam	SKO.replicate-1.bam	OK	41.796	18.1551	-1.20299	-5.82302	0.0002	0.0386492	yes
Ccdc86	Ccdc86	Ccdc86	chr19:10937159-10949266	WT.replicate-2.bam	SKO.replicate-1.bam	OK	6.88158	2.78688	-1.30409	-3.8384	0.0002	0.0386492	yes
Dhx38	Dhx38	Dhx38	chr8:109548023-109565601	WT.replicate-2.bam	SKO.replicate-1.bam	OK	20.7563	10.071	-1.04335	-4.74018	0.0002	0.0386492	yes
Gm6682	Gm6682	Gm6682	chr12:4782169-4783512	WT.replicate-2.bam	SKO.replicate-1.bam	OK	2.51646	8.49363	1.75498	4.6272	0.0002	0.0386492	yes
Hdgfrp2	Hdgfrp2	Hdgfrp2	chr17:56079656-56109802	WT.replicate-2.bam	SKO.replicate-1.bam	OK	21.2439	10.3597	-1.03606	-3.97491	0.0002	0.0386492	yes
Klhdc3	Klhdc3	Klhdc3	chr17:46674550-46680930	WT.replicate-2.bam	SKO.replicate-1.bam	OK	23.5451	11.5617	-1.02607	-3.67766	0.0002	0.0386492	yes
Mcm2	Mcm2	Mcm2	chr6:88883473-88898780	WT.replicate-2.bam	SKO.replicate-1.bam	OK	109.307	62.607	-0.803986	-4.15922	0.0002	0.0386492	yes
Plac8	Plac8	Plac8	chr5:100553732-100572205	WT.replicate-2.bam	SKO.replicate-1.bam	OK	287.698	507.216	0.818045	4.8185	0.0002	0.0386492	yes
Ppm1g	Ppm1g	Ppm1g	chr5:31202667-31220545	WT.replicate-2.bam	SKO.replicate-1.bam	OK	89.3477	50.1311	-0.833727	-3.85423	0.0002	0.0386492	yes
Rbfa	Rbfa	Rbfa	chr18:80192263-80200619	WT.replicate-2.bam	SKO.replicate-1.bam	OK	13.5887	3.67235	-1.88763	-6.4021	0.0002	0.0386492	yes
Rom1	Rom1	Rom1	chr19:8927381-8929356	WT.replicate-2.bam	SKO.replicate-1.bam	OK	60.9418	31.3532	-0.958819	-4.58346	0.0002	0.0386492	yes
Smad4	Smad4	Smad4	chr18:73639012-73703741	WT.replicate-2.bam	SKO.replicate-1.bam	OK	5.21308	1.90351	-1.45347	-4.22457	0.0002	0.0386492	yes
Tagap	Tagap	Tagap	chr17:7925999-7934897	WT.replicate-2.bam	SKO.replicate-1.bam	OK	54.5923	93.9751	0.783582	3.46652	0.0002	0.0386492	yes
Vars	Vars	Vars	chr17:35000906-35016329	WT.replicate-2.bam	SKO.replicate-1.bam	OK	24.4624	11.6361	-1.07195	-5.33575	0.0002	0.0386492	yes
Actn2	Actn2	Actn2	chr13:12269426-12340732	WT.replicate-3.bam	SKO.replicate-1.bam	OK	0.749496	3.06369	2.03128	4.65827	0.0002	0.0386492	yes
Bcl2l11	Bcl2l11	Bcl2l11	chr2:128126037-128162547	WT.replicate-3.bam	SKO.replicate-1.bam	OK	1.38304	3.50935	1.34336	3.93179	0.0002	0.0386492	yes
Ccdc124	Ccdc124	Ccdc124	chr8:70868226-70873490	WT.replicate-3.bam	SKO.replicate-1.bam	OK	190.615	101.706	-0.906258	-6.09239	0.0002	0.0386492	yes
Neurl3	Neurl3	Neurl3	chr1:36264601-36273425	WT.replicate-3.bam	SKO.replicate-1.bam	OK	7.1404	15.9503	1.1595	4.34393	0.0002	0.0386492	yes
Sorl1	Sorl1	Sorl1	chr9:41968488-42124289	WT.replicate-3.bam	SKO.replicate-1.bam	OK	3.28239	7.10293	1.11367	4.29441	0.0002	0.0386492	yes
Actg2	Actg2	Actg2	chr6:83512908-83536251	WT.replicate-1.bam	SKO.replicate-2.bam	OK	2.7687	9.49464	1.7779	4.77394	0.0002	0.0386492	yes
Eomes	Eomes	Eomes	chr9:118478188-118486132	WT.replicate-1.bam	SKO.replicate-2.bam	OK	5.39644	1.6475	-1.71173	-4.60919	0.0002	0.0386492	yes
Klrc1	Klrc1	Klrc1	chr6:129674858-129678910	WT.replicate-1.bam	SKO.replicate-2.bam	OK	430.159	237.34	-0.857917	-3.80508	0.0002	0.0386492	yes
Plek	Plek	Plek	chr11:16971205-17008718	WT.replicate-1.bam	SKO.replicate-2.bam	OK	95.2902	53.5305	-0.831967	-3.13958	0.0002	0.0386492	yes
Sh2d1a	Sh2d1a	Sh2d1a	chrX:42502607-42522075	WT.replicate-1.bam	SKO.replicate-2.bam	OK	242.1	130.855	-0.887634	-4.71295	0.0002	0.0386492	yes
Slc40a1	Slc40a1	Slc40a1	chr1:45908069-45925594	WT.replicate-1.bam	SKO.replicate-2.bam	OK	5.67307	11.9952	1.08025	3.50946	0.0002	0.0386492	yes
Smpd5	Smpd5	Smpd5	chr15:76294433-76307245	WT.replicate-1.bam	SKO.replicate-2.bam	OK	3.64445	9.936	1.44696	5.17656	0.0002	0.0386492	yes
As3mt	As3mt	As3mt	chr19:46707442-46741095	WT.replicate-2.bam	SKO.replicate-2.bam	OK	15.0035	6.44306	-1.21948	-4.21947	0.0002	0.0386492	yes
Tmem2	Tmem2	Tmem2	chr19:21778341-21858327	WT.replicate-2.bam	SKO.replicate-2.bam	OK	3.02877	6.2543	1.04611	3.75067	0.0002	0.0386492	yes
Ahr	Ahr	Ahr	chr12:35497978-35534989	WT.replicate-3.bam	SKO.replicate-2.bam	OK	0.583906	1.85233	1.66553	3.82054	0.0002	0.0386492	yes
Ccl3	Ccl3	Ccl3	chr11:83647842-83649378	WT.replicate-3.bam	SKO.replicate-2.bam	OK	42.2384	18.9367	-1.15737	-4.62312	0.0002	0.0386492	yes
Itgb1	Itgb1	Itgb1	chr8:128685653-128733579	WT.replicate-3.bam	SKO.replicate-2.bam	OK	94.4773	163.988	0.795548	3.27086	0.0002	0.0386492	yes
Mtpn	Mtpn	Mtpn	chr6:35508823-35539888	WT.replicate-3.bam	SKO.replicate-2.bam	OK	56.3131	31.2206	-0.850975	-3.19878	0.0002	0.0386492	yes
Serpinb6b	Serpinb6b	Serpinb6b	chr13:32965512-32979037	WT.replicate-3.bam	SKO.replicate-2.bam	OK	207.101	120.102	-0.786077	-3.26279	0.0002	0.0386492	yes
Smpd5	Smpd5	Smpd5	chr15:76294433-76307245	WT.replicate-3.bam	SKO.replicate-2.bam	OK	3.2328	9.936	1.61988	5.53667	0.0002	0.0386492	yes
Tmem2	Tmem2	Tmem2	chr19:21778341-21858327	WT.replicate-3.bam	SKO.replicate-2.bam	OK	2.85913	6.2543	1.12927	3.97925	0.0002	0.0386492	yes
Cd69	Cd69	Cd69	chr6:129267324-129275369	WT.replicate-2.bam	SKO.replicate-3.bam	OK	120.496	213.369	0.82437	3.38128	0.0002	0.0386492	yes
Smad4	Smad4	Smad4	chr18:73639012-73703741	WT.replicate-2.bam	SKO.replicate-3.bam	OK	5.21308	1.93159	-1.43235	-4.1535	0.0002	0.0386492	yes
AI467606	AI467606	AI467606	chr7:127091435-127094049	SKO.replicate-1.bam	SKO.replicate-3.bam	OK	19.2448	38.5152	1.00096	4.27246	0.0002	0.0386492	yes
Cd69	Cd69	Cd69	chr6:129267324-129275369	SKO.replicate-2.bam	SKO.replicate-3.bam	OK	118.869	213.369	0.843978	3.47992	0.0002	0.0386492	yes
Rn45s	Rn45s	Rn45s	chr17:39842996-39848829	SKO.replicate-2.bam	SKO.replicate-3.bam	OK	227.442	395.507	0.798203	6.72697	0.0002	0.0386492	yes
Gm12250	Gm12250	Gm12250	chr11:58183842-58190198	WT.replicate-1.bam	WT.replicate-2.bam	OK	24.3268	11.4903	-1.08213	-3.89594	0.00015	0.030784	yes
Gm14446	Gm14446	Gm14446	chr19:34592887-34601968	WT.replicate-1.bam	WT.replicate-2.bam	OK	5.63709	1.41778	-1.99132	-4.99024	0.00015	0.030784	yes
Pydc4	Pydc4	Pydc4	chr1:173591956-173599274	WT.replicate-1.bam	WT.replicate-2.bam	OK	5.02657	1.7041	-1.56057	-4.35789	0.00015	0.030784	yes
Slfn1	Slfn1	Slfn1	chr11:83116844-83122659	WT.replicate-1.bam	WT.replicate-2.bam	OK	24.4025	11.6306	-1.0691	-3.69115	0.00015	0.030784	yes
Klf6	Klf6	Klf6	chr13:5861488-5870393	WT.replicate-2.bam	WT.replicate-3.bam	OK	40.5044	70.6653	0.802924	3.18797	0.00015	0.030784	yes
Rtp4	Rtp4	Rtp4	chr16:23609918-23614222	WT.replicate-2.bam	WT.replicate-3.bam	OK	17.4787	35.6491	1.02827	3.81448	0.00015	0.030784	yes
Apol7e	Apol7e	Apol7e	chr15:77698888-77719288	WT.replicate-1.bam	SKO.replicate-1.bam	OK	2.65626	7.03697	1.40556	3.73669	0.00015	0.030784	yes
Hnrnpm	Hnrnpm	Hnrnpm	chr17:33646232-33685458	WT.replicate-1.bam	SKO.replicate-1.bam	OK	152.178	85.2403	-0.836149	-3.69726	0.00015	0.030784	yes
Tsc22d1	Tsc22d1	Tsc22d1	chr14:76415820-76507766	WT.replicate-1.bam	SKO.replicate-1.bam	OK	2.75236	8.19011	1.57321	4.01846	0.00015	0.030784	yes
Apobr	Apobr	Apobr	chr7:126585007-126589092	WT.replicate-2.bam	SKO.replicate-1.bam	OK	3.11692	0.896066	-1.79844	-4.41191	0.00015	0.030784	yes
Ccnd3	Ccnd3	Ccnd3	chr17:47505050-47611492	WT.replicate-2.bam	SKO.replicate-1.bam	OK	82.8448	37.7697	-1.13318	-4.58687	0.00015	0.030784	yes
Fgl2	Fgl2	Fgl2	chr5:21292960-21424677	WT.replicate-2.bam	SKO.replicate-1.bam	OK	0.857786	2.5415	1.56699	3.89854	0.00015	0.030784	yes
Gramd3	Gramd3	Gramd3	chr18:56432131-56503792	WT.replicate-2.bam	SKO.replicate-1.bam	OK	94.1136	167.256	0.829586	3.78202	0.00015	0.030784	yes
Hspbp1	Hspbp1	Hspbp1	chr7:4660520-4684963	WT.replicate-2.bam	SKO.replicate-1.bam	OK	51.7873	22.8888	-1.17795	-5.94768	0.00015	0.030784	yes
Iigp1	Iigp1	Iigp1	chr18:60376028-60392629	WT.replicate-2.bam	SKO.replicate-1.bam	OK	0.769132	2.93086	1.93002	4.49172	0.00015	0.030784	yes
Nop2	Nop2	Nop2	chr6:125131882-125144753	WT.replicate-2.bam	SKO.replicate-1.bam	OK	44.9557	24.0491	-0.90252	-4.13718	0.00015	0.030784	yes
Pfas	Pfas	Pfas	chr11:68985700-69008460	WT.replicate-2.bam	SKO.replicate-1.bam	OK	13.8397	6.6129	-1.06546	-4.22424	0.00015	0.030784	yes
Ruvbl2	Ruvbl2	Ruvbl2	chr7:45421897-45434464	WT.replicate-2.bam	SKO.replicate-1.bam	OK	93.4494	50.8165	-0.878889	-4.832	0.00015	0.030784	yes
Slfn2	Slfn2	Slfn2	chr11:83065111-83070678	WT.replicate-2.bam	SKO.replicate-1.bam	OK	213.154	364.558	0.774252	3.58241	0.00015	0.030784	yes
Sppl2b	Sppl2b	Sppl2b	chr10:80855274-80868708	WT.replicate-2.bam	SKO.replicate-1.bam	OK	6.28748	1.93406	-1.70085	-5.49082	0.00015	0.030784	yes
Trmt1	Trmt1	Trmt1	chr8:84689246-84699808	WT.replicate-2.bam	SKO.replicate-1.bam	OK	13.1262	5.60221	-1.22838	-3.91028	0.00015	0.030784	yes
Wbp2	Wbp2	Wbp2	chr11:116078572-116086964	WT.replicate-2.bam	SKO.replicate-1.bam	OK	107.496	59.1193	-0.862586	-4.37357	0.00015	0.030784	yes
Amica1	Amica1	Amica1	chr9:45079182-45135606	WT.replicate-3.bam	SKO.replicate-1.bam	OK	19.9792	39.5888	0.986593	3.78489	0.00015	0.030784	yes
Dusp2	Dusp2	Dusp2	chr2:127336158-127338377	WT.replicate-3.bam	SKO.replicate-1.bam	OK	54.8089	101.147	0.883965	5.02416	0.00015	0.030784	yes
Fasn	Fasn	Fasn	chr11:120805957-120824547	WT.replicate-3.bam	SKO.replicate-1.bam	OK	6.15441	2.88983	-1.09063	-4.5391	0.00015	0.030784	yes
Gramd4	Gramd4	Gramd4	chr15:86057694-86137636	WT.replicate-3.bam	SKO.replicate-1.bam	OK	12.3881	5.40742	-1.19594	-4.30791	0.00015	0.030784	yes
Grwd1	Grwd1	Grwd1	chr7:45825222-45830789	WT.replicate-3.bam	SKO.replicate-1.bam	OK	47.379	24.1319	-0.973306	-4.51595	0.00015	0.030784	yes
H2-DMa	H2-DMa	H2-DMa	chr17:34122831-34139101	WT.replicate-3.bam	SKO.replicate-1.bam	OK	15.8786	33.0819	1.05896	4.67666	0.00015	0.030784	yes
Ipo4	Ipo4	Ipo4	chr14:55625628-55635678	WT.replicate-3.bam	SKO.replicate-1.bam	OK	14.0915	6.32781	-1.15505	-4.61777	0.00015	0.030784	yes
Irf8	Irf8	Irf8	chr8:120736375-120756692	WT.replicate-3.bam	SKO.replicate-1.bam	OK	15.614	6.94212	-1.16939	-4.64014	0.00015	0.030784	yes
Mrpl12	Mrpl12	Mrpl12	chr11:120484668-120488754	WT.replicate-3.bam	SKO.replicate-1.bam	OK	253.9	139.993	-0.858912	-5.11234	0.00015	0.030784	yes
Rbck1	Rbck1	Rbck1	chr2:152316333-152332639	WT.replicate-3.bam	SKO.replicate-1.bam	OK	33.8227	17.4726	-0.952895	-3.67331	0.00015	0.030784	yes
Szrd1	Szrd1	Szrd1	chr4:141113014-141139796	WT.replicate-3.bam	SKO.replicate-1.bam	OK	50.5308	27.7321	-0.865605	-3.65317	0.00015	0.030784	yes
Tcp11l2	Tcp11l2	Tcp11l2	chr10:84576946-84614355	WT.replicate-3.bam	SKO.replicate-1.bam	OK	14.2517	29.7444	1.06148	3.97122	0.00015	0.030784	yes
Ctla4	Ctla4	Ctla4	chr1:60909024-60915830	WT.replicate-1.bam	SKO.replicate-2.bam	OK	168.712	93.4819	-0.851805	-3.54882	0.00015	0.030784	yes
Mx1	Mx1	Mx1	chr16:97447034-97462906	WT.replicate-1.bam	SKO.replicate-2.bam	OK	6.48658	2.41062	-1.42806	-4.2563	0.00015	0.030784	yes
Rhoh	Rhoh	Rhoh	chr5:65863568-65896700	WT.replicate-1.bam	SKO.replicate-2.bam	OK	23.9128	12.9608	-0.883626	-3.46765	0.00015	0.030784	yes
Sbk1	Sbk1	Sbk1	chr7:126272618-126294999	WT.replicate-1.bam	SKO.replicate-2.bam	OK	4.06772	9.26732	1.18793	4.97342	0.00015	0.030784	yes
Cd7	Cd7	Cd7	chr11:121036748-121039478	WT.replicate-2.bam	SKO.replicate-2.bam	OK	73.5105	144.508	0.97513	4.84307	0.00015	0.030784	yes
Mgst2	Mgst2	Mgst2	chr3:51661192-51682675	WT.replicate-2.bam	SKO.replicate-2.bam	OK	11.0081	35.767	1.70007	6.63498	0.00015	0.030784	yes
Ctla2a	Ctla2a	Ctla2a	chr13:60934154-60936625	WT.replicate-3.bam	SKO.replicate-2.bam	OK	118.09	64.7832	-0.866197	-3.69096	0.00015	0.030784	yes
Rhoh	Rhoh	Rhoh	chr5:65863568-65896700	WT.replicate-3.bam	SKO.replicate-2.bam	OK	24.1797	12.9608	-0.899638	-3.54081	0.00015	0.030784	yes
Trf	Trf	Trf	chr9:103208875-103230286	WT.replicate-3.bam	SKO.replicate-2.bam	OK	2.40416	7.30702	1.60375	4.66712	0.00015	0.030784	yes
Tubb6	Tubb6	Tubb6	chr18:67390730-67402749	WT.replicate-3.bam	SKO.replicate-2.bam	OK	3.61109	11.9079	1.72142	5.93447	0.00015	0.030784	yes
Plk1	Plk1	Plk1	chr7:122159436-122169875	SKO.replicate-1.bam	SKO.replicate-2.bam	OK	88.3739	160.472	0.860628	4.67415	0.00015	0.030784	yes
Ahr	Ahr	Ahr	chr12:35497978-35534989	WT.replicate-1.bam	SKO.replicate-3.bam	OK	0.419893	1.5439	1.87848	3.93318	0.00015	0.030784	yes
Ctse	Ctse	Ctse	chr1:131638313-131675507	WT.replicate-1.bam	SKO.replicate-3.bam	OK	156.456	87.2292	-0.84287	-3.88025	0.00015	0.030784	yes
Ndfip1	Ndfip1	Ndfip1	chr18:38418974-38464406	WT.replicate-1.bam	SKO.replicate-3.bam	OK	60.913	26.5074	-1.20035	-5.54021	0.00015	0.030784	yes
AW112010	AW112010	AW112010	chr19:11047611-11050566	WT.replicate-2.bam	SKO.replicate-3.bam	OK	1037.16	1851.23	0.835849	4.383	0.00015	0.030784	yes
Eif4g1	Eif4g1	Eif4g1	chr16:20672748-20692883	WT.replicate-2.bam	SKO.replicate-3.bam	OK	9.05325	4.16374	-1.12056	-4.08414	0.00015	0.030784	yes
Gzmb	Gzmb	Gzmb	chr14:56258857-56262260	WT.replicate-2.bam	SKO.replicate-3.bam	OK	1570.95	863.146	-0.863959	-3.99364	0.00015	0.030784	yes
Gzmb	Gzmb	Gzmb	chr14:56258857-56262260	WT.replicate-3.bam	SKO.replicate-3.bam	OK	1569.83	863.146	-0.86293	-3.98182	0.00015	0.030784	yes
Cd69	Cd69	Cd69	chr6:129267324-129275369	WT.replicate-2.bam	WT.replicate-3.bam	OK	120.496	221.968	0.881365	3.6787	0.0001	0.0220693	yes
Ak2	Ak2	Ak2	chr4:128993223-129011529	WT.replicate-1.bam	SKO.replicate-1.bam	OK	118.441	65.3397	-0.858133	-3.67872	0.0001	0.0220693	yes
Cd7	Cd7	Cd7	chr11:121036748-121039478	WT.replicate-1.bam	SKO.replicate-1.bam	OK	103.102	196.38	0.92958	4.73334	0.0001	0.0220693	yes
Cpd	Cpd	Cpd	chr11:76777207-76847008	WT.replicate-1.bam	SKO.replicate-1.bam	OK	0.466227	1.41924	1.60601	3.84439	0.0001	0.0220693	yes
Gpr68	Gpr68	Gpr68	chr12:100876681-100908198	WT.replicate-1.bam	SKO.replicate-1.bam	OK	17.2292	34.3969	0.997425	4.09787	0.0001	0.0220693	yes
Rbm14	Rbm14	Rbm14	chr19:4800924-4811634	WT.replicate-1.bam	SKO.replicate-1.bam	OK	43.0167	23.2193	-0.889571	-4.61877	0.0001	0.0220693	yes
Trim16	Trim16	Trim16	chr11:62820252-62842948	WT.replicate-1.bam	SKO.replicate-1.bam	OK	0.348965	2.36889	2.76306	5.31804	0.0001	0.0220693	yes
Vcam1	Vcam1	Vcam1	chr3:116110019-116129688	WT.replicate-1.bam	SKO.replicate-1.bam	OK	4.22322	9.42452	1.15807	3.63488	0.0001	0.0220693	yes
Apol9b	Apol9b	Apol9b	chr15:77729071-77736382	WT.replicate-2.bam	SKO.replicate-1.bam	OK	0.545506	12.5771	4.52706	7.28204	0.0001	0.0220693	yes
Eif4g1	Eif4g1	Eif4g1	chr16:20672748-20692883	WT.replicate-2.bam	SKO.replicate-1.bam	OK	9.05325	4.1861	-1.11283	-4.05738	0.0001	0.0220693	yes
Fkbp4	Fkbp4	Fkbp4	chr6:128430106-128438631	WT.replicate-2.bam	SKO.replicate-1.bam	OK	112.69	62.2912	-0.85526	-4.34534	0.0001	0.0220693	yes
Gars	Gars	Gars	chr6:55038000-55079504	WT.replicate-2.bam	SKO.replicate-1.bam	OK	66.6042	34.1379	-0.96424	-4.20129	0.0001	0.0220693	yes
Gbp6	Gbp6	Gbp6	chr5:105270701-105293699	WT.replicate-2.bam	SKO.replicate-1.bam	OK	4.06047	8.93185	1.13731	3.39739	0.0001	0.0220693	yes
Grwd1	Grwd1	Grwd1	chr7:45825222-45830789	WT.replicate-2.bam	SKO.replicate-1.bam	OK	49.2732	24.1319	-1.02986	-4.87195	0.0001	0.0220693	yes
H2-DMa	H2-DMa	H2-DMa	chr17:34122831-34139101	WT.replicate-2.bam	SKO.replicate-1.bam	OK	14.5015	33.0819	1.18984	5.26615	0.0001	0.0220693	yes
Hmox1	Hmox1	Hmox1	chr8:75093617-75100593	WT.replicate-2.bam	SKO.replicate-1.bam	OK	25.9002	52.5528	1.0208	4.53758	0.0001	0.0220693	yes
Ifit1	Ifit1	Ifit1	chr19:34640888-34650009	WT.replicate-2.bam	SKO.replicate-1.bam	OK	1.8048	6.2539	1.79292	4.33196	0.0001	0.0220693	yes
Mybbp1a	Mybbp1a	Mybbp1a	chr11:72441377-72451550	WT.replicate-2.bam	SKO.replicate-1.bam	OK	37.591	18.7795	-1.00123	-4.41113	0.0001	0.0220693	yes
Nek7	Nek7	Nek7	chr1:138484713-138619696	WT.replicate-2.bam	SKO.replicate-1.bam	OK	18.1738	33.8329	0.896563	3.26645	0.0001	0.0220693	yes
Nol6	Nol6	Nol6	chr4:41114426-41124339	WT.replicate-2.bam	SKO.replicate-1.bam	OK	9.3709	4.20228	-1.15702	-4.56313	0.0001	0.0220693	yes
Nsun2	Nsun2	Nsun2	chr13:69612015-69635779	WT.replicate-2.bam	SKO.replicate-1.bam	OK	21.1673	10.407	-1.02429	-3.97868	0.0001	0.0220693	yes
Rapgef1	Rapgef1	Rapgef1	chr2:29619719-29740363	WT.replicate-2.bam	SKO.replicate-1.bam	OK	12.8595	6.59788	-0.96276	-3.74663	0.0001	0.0220693	yes
Samm50	Samm50	Samm50	chr15:84192232-84214303	WT.replicate-2.bam	SKO.replicate-1.bam	OK	79.5578	40.1341	-0.987175	-4.94726	0.0001	0.0220693	yes
Srm	Srm	Srm	chr4:148591512-148594619	WT.replicate-2.bam	SKO.replicate-1.bam	OK	19.5809	7.58174	-1.36885	-5.45583	0.0001	0.0220693	yes
Syncrip	Syncrip	Syncrip	chr9:88449737-88482397	WT.replicate-2.bam	SKO.replicate-1.bam	OK	46.0555	23.438	-0.974521	-3.76336	0.0001	0.0220693	yes
Trim34a	Trim34a	Trim34a	chr7:104244456-104262236	WT.replicate-2.bam	SKO.replicate-1.bam	OK	6.13921	13.9194	1.18097	3.74009	0.0001	0.0220693	yes
Zap70	Zap70	Zap70	chr1:36761860-36782816	WT.replicate-2.bam	SKO.replicate-1.bam	OK	117.816	63.2059	-0.898405	-5.20861	0.0001	0.0220693	yes
9130401M01Rik	9130401M01Rik	9130401M01Rik	chr15:58022270-58034294	WT.replicate-3.bam	SKO.replicate-1.bam	OK	51.501	24.1636	-1.09176	-5.26453	0.0001	0.0220693	yes
Ahr	Ahr	Ahr	chr12:35497978-35534989	WT.replicate-3.bam	SKO.replicate-1.bam	OK	0.583906	1.93402	1.72779	3.99019	0.0001	0.0220693	yes
Cd5	Cd5	Cd5	chr19:10718142-10738974	WT.replicate-3.bam	SKO.replicate-1.bam	OK	172.44	88.3799	-0.964301	-4.7911	0.0001	0.0220693	yes
Cmss1	Cmss1	Cmss1	chr16:57301999-57606867	WT.replicate-3.bam	SKO.replicate-1.bam	OK	38.9609	18.4713	-1.07674	-4.15792	0.0001	0.0220693	yes
Fbxl8	Fbxl8	Fbxl8	chr8:105264647-105269326	WT.replicate-3.bam	SKO.replicate-1.bam	OK	22.1326	9.62422	-1.20143	-5.97722	0.0001	0.0220693	yes
Nle1	Nle1	Nle1	chr11:82900767-82908395	WT.replicate-3.bam	SKO.replicate-1.bam	OK	15.0249	6.1028	-1.29981	-5.03456	0.0001	0.0220693	yes
Rpph1	Rpph1	Rpph1	chr14:50807446-50807771	WT.replicate-3.bam	SKO.replicate-1.bam	OK	530.907	233.753	-1.18348	-13.5423	0.0001	0.0220693	yes
Srsf10	Srsf10	Srsf10	chr4:135856091-135869899	WT.replicate-3.bam	SKO.replicate-1.bam	OK	65.5856	37.8897	-0.791575	-3.43912	0.0001	0.0220693	yes
Tcof1	Tcof1	Tcof1	chr18:60813755-60848964	WT.replicate-3.bam	SKO.replicate-1.bam	OK	26.8081	13.844	-0.953402	-3.90003	0.0001	0.0220693	yes
Tnfaip3	Tnfaip3	Tnfaip3	chr10:19000909-19015410	WT.replicate-3.bam	SKO.replicate-1.bam	OK	36.3823	67.45	0.890583	3.9684	0.0001	0.0220693	yes
Trf	Trf	Trf	chr9:103208875-103230286	WT.replicate-3.bam	SKO.replicate-1.bam	OK	2.40416	8.14831	1.76097	5.15727	0.0001	0.0220693	yes
Ywhag	Ywhag	Ywhag	chr5:135908378-135934641	WT.replicate-3.bam	SKO.replicate-1.bam	OK	21.9221	10.808	-1.02029	-4.52582	0.0001	0.0220693	yes
Ahr	Ahr	Ahr	chr12:35497978-35534989	WT.replicate-1.bam	SKO.replicate-2.bam	OK	0.419893	1.85233	2.14124	4.55696	0.0001	0.0220693	yes
Cd53	Cd53	Cd53	chr3:106758860-106790149	WT.replicate-1.bam	SKO.replicate-2.bam	OK	220.566	117.158	-0.91276	-3.41375	0.0001	0.0220693	yes
Cpd	Cpd	Cpd	chr11:76777207-76847008	WT.replicate-1.bam	SKO.replicate-2.bam	OK	0.466227	1.51326	1.69856	4.07712	0.0001	0.0220693	yes
Gm12250	Gm12250	Gm12250	chr11:58183842-58190198	WT.replicate-1.bam	SKO.replicate-2.bam	OK	24.3268	10.7885	-1.17306	-4.21851	0.0001	0.0220693	yes
Gpr68	Gpr68	Gpr68	chr12:100876681-100908198	WT.replicate-1.bam	SKO.replicate-2.bam	OK	17.2292	33.9384	0.978061	3.99763	0.0001	0.0220693	yes
H2-Q10	H2-Q10	H2-Q10	chr17:35470088-35474563	WT.replicate-1.bam	SKO.replicate-2.bam	OK	36.0059	16.647	-1.11297	-4.95222	0.0001	0.0220693	yes
Ndfip1	Ndfip1	Ndfip1	chr18:38418974-38464406	WT.replicate-1.bam	SKO.replicate-2.bam	OK	60.913	26.6224	-1.19411	-5.44136	0.0001	0.0220693	yes
Trim16	Trim16	Trim16	chr11:62820252-62842948	WT.replicate-1.bam	SKO.replicate-2.bam	OK	0.348965	2.29582	2.71786	5.22043	0.0001	0.0220693	yes
Btg1	Btg1	Btg1	chr10:96617000-96622811	WT.replicate-2.bam	SKO.replicate-2.bam	OK	17.8452	32.0179	0.843345	3.19905	0.0001	0.0220693	yes
C1qb	C1qb	C1qb	chr4:136880144-136886177	WT.replicate-2.bam	SKO.replicate-2.bam	OK	7.87973	21.0598	1.41828	5.36062	0.0001	0.0220693	yes
Rn45s	Rn45s	Rn45s	chr17:39842996-39848829	WT.replicate-2.bam	SKO.replicate-2.bam	OK	399.496	227.442	-0.812683	-6.77469	0.0001	0.0220693	yes
Casp1	Casp1	Casp1	chr9:5298516-5307281	WT.replicate-3.bam	SKO.replicate-2.bam	OK	31.4254	15.7517	-0.99642	-3.42776	0.0001	0.0220693	yes
Gm8369	Gm8369	Gm8369	chr19:11492037-11512577	WT.replicate-3.bam	SKO.replicate-2.bam	OK	22.3336	10.0243	-1.15571	-3.55618	0.0001	0.0220693	yes
Gpr68	Gpr68	Gpr68	chr12:100876681-100908198	WT.replicate-3.bam	SKO.replicate-2.bam	OK	18.03	33.9384	0.912514	3.75002	0.0001	0.0220693	yes
Il10ra	Il10ra	Il10ra	chr9:45253838-45269146	WT.replicate-3.bam	SKO.replicate-2.bam	OK	13.0038	6.36073	-1.03167	-3.73911	0.0001	0.0220693	yes
Xdh	Xdh	Xdh	chr17:73883907-73950182	WT.replicate-3.bam	SKO.replicate-2.bam	OK	6.36849	2.78572	-1.1929	-3.9783	0.0001	0.0220693	yes
Pyhin1	Pyhin1	Pyhin1	chr1:173630858-173647928	SKO.replicate-1.bam	SKO.replicate-2.bam	OK	15.0037	7.30695	-1.03798	-3.15949	0.0001	0.0220693	yes
Tap2	Tap2	Tap2	chr17:34204478-34216321	SKO.replicate-1.bam	SKO.replicate-2.bam	OK	60.3092	107.283	0.830975	4.59475	0.0001	0.0220693	yes
Eomes	Eomes	Eomes	chr9:118478188-118486132	WT.replicate-1.bam	SKO.replicate-3.bam	OK	5.39644	1.83572	-1.55566	-4.30031	0.0001	0.0220693	yes
Map3k8	Map3k8	Map3k8	chr18:4331326-4352953	WT.replicate-1.bam	SKO.replicate-3.bam	OK	23.5967	11.1422	-1.08255	-3.89696	0.0001	0.0220693	yes
Slc2a3	Slc2a3	Slc2a3	chr6:122727808-122742745	WT.replicate-1.bam	SKO.replicate-3.bam	OK	24.1644	12.3184	-0.972065	-3.9743	0.0001	0.0220693	yes
Amica1	Amica1	Amica1	chr9:45079182-45135606	WT.replicate-2.bam	SKO.replicate-3.bam	OK	17.8073	35.1561	0.981306	3.68638	0.0001	0.0220693	yes
Apol7e	Apol7e	Apol7e	chr15:77698888-77719288	WT.replicate-2.bam	SKO.replicate-3.bam	OK	1.83162	5.94875	1.69946	4.15671	0.0001	0.0220693	yes
Ctss	Ctss	Ctss	chr3:95526785-95556403	WT.replicate-2.bam	SKO.replicate-3.bam	OK	58.5889	114.836	0.970869	4.11073	0.0001	0.0220693	yes
Eomes	Eomes	Eomes	chr9:118478188-118486132	WT.replicate-2.bam	SKO.replicate-3.bam	OK	5.00527	1.83572	-1.4471	-4.00484	0.0001	0.0220693	yes
Gzma	Gzma	Gzma	chr13:113093826-113100981	WT.replicate-2.bam	SKO.replicate-3.bam	OK	998.131	1829.85	0.874423	4.30038	0.0001	0.0220693	yes
Inpp4b	Inpp4b	Inpp4b	chr8:81715199-82122561	WT.replicate-2.bam	SKO.replicate-3.bam	OK	2.87897	6.88087	1.25704	3.58066	0.0001	0.0220693	yes
Thop1	Thop1	Thop1	chr10:81070082-81082360	WT.replicate-2.bam	SKO.replicate-3.bam	OK	8.24947	2.8797	-1.51839	-5.56353	0.0001	0.0220693	yes
Tnfrsf13c	Tnfrsf13c	Tnfrsf13c	chr15:82221743-82224336	WT.replicate-2.bam	SKO.replicate-3.bam	OK	14.4356	32.8194	1.18492	4.7647	0.0001	0.0220693	yes
Vps37b	Vps37b	Vps37b	chr5:124004640-124032260	WT.replicate-2.bam	SKO.replicate-3.bam	OK	22.1807	10.7237	-1.04851	-4.66816	0.0001	0.0220693	yes
Cdc34	Cdc34	Cdc34	chr10:79682194-79688398	WT.replicate-3.bam	SKO.replicate-3.bam	OK	57.2234	27.1854	-1.07377	-6.13699	0.0001	0.0220693	yes
Eomes	Eomes	Eomes	chr9:118478188-118486132	WT.replicate-3.bam	SKO.replicate-3.bam	OK	5.3133	1.83572	-1.53326	-4.2277	0.0001	0.0220693	yes
Plk1	Plk1	Plk1	chr7:122159436-122169875	SKO.replicate-1.bam	SKO.replicate-3.bam	OK	88.3739	173.726	0.975125	5.34098	0.0001	0.0220693	yes
Cd69	Cd69	Cd69	chr6:129267324-129275369	WT.replicate-1.bam	WT.replicate-2.bam	OK	260.932	120.496	-1.11469	-4.62877	5e-05	0.0123202	yes
Gbp6	Gbp6	Gbp6	chr5:105270701-105293699	WT.replicate-1.bam	WT.replicate-2.bam	OK	10.1805	4.06047	-1.3261	-3.98597	5e-05	0.0123202	yes
Gzma	Gzma	Gzma	chr13:113093826-113100981	WT.replicate-1.bam	WT.replicate-2.bam	OK	1982.55	998.131	-0.990055	-4.88795	5e-05	0.0123202	yes
Hist1h4d	Hist1h4d	Hist1h4d	chr13:23581601-23581913	WT.replicate-1.bam	WT.replicate-2.bam	OK	2245.06	1169.02	-0.941454	-15.1177	5e-05	0.0123202	yes
Ifi27l2a	Ifi27l2a	Ifi27l2a	chr12:103442166-103443680	WT.replicate-1.bam	WT.replicate-2.bam	OK	1244.58	598.043	-1.05734	-7.79741	5e-05	0.0123202	yes
Igj	Igj	Igj	chr5:88519808-88527897	WT.replicate-1.bam	WT.replicate-2.bam	OK	0.533034	0	#NAME?	#NAME?	5e-05	0.0123202	yes
Irf1	Irf1	Irf1	chr11:53770013-53778374	WT.replicate-1.bam	WT.replicate-2.bam	OK	286.519	152.528	-0.909558	-4.14183	5e-05	0.0123202	yes
Ly6d	Ly6d	Ly6d	chr15:74762055-74763567	WT.replicate-1.bam	WT.replicate-2.bam	OK	2.20071	0	#NAME?	#NAME?	5e-05	0.0123202	yes
Rtp4	Rtp4	Rtp4	chr16:23609918-23614222	WT.replicate-1.bam	WT.replicate-2.bam	OK	45.731	17.4787	-1.38758	-5.19854	5e-05	0.0123202	yes
Tgtp1	Tgtp1	Tgtp1	chr11:48985328-48992246	WT.replicate-1.bam	WT.replicate-2.bam	OK	9.45469	3.406	-1.47295	-4.22896	5e-05	0.0123202	yes
Tsc22d3	Tsc22d3	Tsc22d3	chrX:140539528-140600522	WT.replicate-1.bam	WT.replicate-2.bam	OK	156.524	79.3951	-0.979264	-4.35882	5e-05	0.0123202	yes
Actb	Actb	Actb	chr5:142903115-142906724	WT.replicate-1.bam	WT.replicate-3.bam	OK	13849.2	12989.9	-0.0924074	-32.4494	5e-05	0.0123202	yes
Fos	Fos	Fos	chr12:85473900-85477270	WT.replicate-2.bam	WT.replicate-3.bam	OK	26.6027	52.9028	0.991771	4.517	5e-05	0.0123202	yes
Ly6d	Ly6d	Ly6d	chr15:74762055-74763567	WT.replicate-2.bam	WT.replicate-3.bam	OK	0	1.58111	inf	#NAME?	5e-05	0.0123202	yes
Actb	Actb	Actb	chr5:142903115-142906724	WT.replicate-1.bam	SKO.replicate-1.bam	OK	13849.2	15011.6	0.116285	42.3932	5e-05	0.0123202	yes
Ahr	Ahr	Ahr	chr12:35497978-35534989	WT.replicate-1.bam	SKO.replicate-1.bam	OK	0.419893	1.93402	2.20351	4.71675	5e-05	0.0123202	yes
Apol9b	Apol9b	Apol9b	chr15:77729071-77736382	WT.replicate-1.bam	SKO.replicate-1.bam	OK	0.626999	12.5771	4.3262	7.34224	5e-05	0.0123202	yes
Bop1	Bop1	Bop1	chr15:76380512-76477269	WT.replicate-1.bam	SKO.replicate-1.bam	OK	46.8025	23.9541	-0.966313	-3.99329	5e-05	0.0123202	yes
Car2	Car2	Car2	chr3:14886425-14900770	WT.replicate-1.bam	SKO.replicate-1.bam	OK	48.0822	119.636	1.31508	6.18945	5e-05	0.0123202	yes
Ccl5	Ccl5	Ccl5	chr11:83525778-83530518	WT.replicate-1.bam	SKO.replicate-1.bam	OK	2881.26	1145.4	-1.33085	-9.74331	5e-05	0.0123202	yes
Ccr5	Ccr5	Ccr5	chr9:124121542-124127183	WT.replicate-1.bam	SKO.replicate-1.bam	OK	21.8697	9.88286	-1.14593	-4.05337	5e-05	0.0123202	yes
Cd74	Cd74	Cd74	chr18:60803848-60812652	WT.replicate-1.bam	SKO.replicate-1.bam	OK	26.8145	69.984	1.38401	5.25374	5e-05	0.0123202	yes
Clec12a	Clec12a	Clec12a	chr6:129350243-129365303	WT.replicate-1.bam	SKO.replicate-1.bam	OK	0.723275	4.62481	2.67678	5.00707	5e-05	0.0123202	yes
Coro2a	Coro2a	Coro2a	chr4:46536936-46601929	WT.replicate-1.bam	SKO.replicate-1.bam	OK	4.14714	10.1713	1.29431	4.48105	5e-05	0.0123202	yes
Eomes	Eomes	Eomes	chr9:118478188-118486132	WT.replicate-1.bam	SKO.replicate-1.bam	OK	5.39644	1.48029	-1.86613	-5.02618	5e-05	0.0123202	yes
Gimap7	Gimap7	Gimap7	chr6:48718620-48724636	WT.replicate-1.bam	SKO.replicate-1.bam	OK	127.975	50.2358	-1.34907	-5.93039	5e-05	0.0123202	yes
Gzmb	Gzmb	Gzmb	chr14:56258857-56262260	WT.replicate-1.bam	SKO.replicate-1.bam	OK	1841.31	931.212	-0.98355	-4.51076	5e-05	0.0123202	yes
H13	H13	H13	chr2:152669460-152708668	WT.replicate-1.bam	SKO.replicate-1.bam	OK	18.18	6.42423	-1.50076	-5.43661	5e-05	0.0123202	yes
H2-Q10	H2-Q10	H2-Q10	chr17:35470088-35474563	WT.replicate-1.bam	SKO.replicate-1.bam	OK	36.0059	11.5892	-1.63545	-6.9232	5e-05	0.0123202	yes
Hmga1	Hmga1	Hmga1	chr17:27556573-27563672	WT.replicate-1.bam	SKO.replicate-1.bam	OK	135.768	39.2072	-1.79195	-5.62088	5e-05	0.0123202	yes
Ifitm1	Ifitm1	Ifitm1	chr7:140967428-140969827	WT.replicate-1.bam	SKO.replicate-1.bam	OK	314.332	1433.76	2.18944	9.75412	5e-05	0.0123202	yes
Ifitm2	Ifitm2	Ifitm2	chr7:140954838-140955961	WT.replicate-1.bam	SKO.replicate-1.bam	OK	68.1999	310.01	2.18447	12.4209	5e-05	0.0123202	yes
Ifitm3	Ifitm3	Ifitm3	chr7:141009589-141010744	WT.replicate-1.bam	SKO.replicate-1.bam	OK	68.4681	160.629	1.23023	6.92791	5e-05	0.0123202	yes
Igflr1	Igflr1	Igflr1	chr7:30565426-30567962	WT.replicate-1.bam	SKO.replicate-1.bam	OK	15.3824	47.2559	1.61922	7.00127	5e-05	0.0123202	yes
Il7r	Il7r	Il7r	chr15:9506158-9529876	WT.replicate-1.bam	SKO.replicate-1.bam	OK	6.709	16.0152	1.25527	4.01407	5e-05	0.0123202	yes
Isg20	Isg20	Isg20	chr7:78913764-78920396	WT.replicate-1.bam	SKO.replicate-1.bam	OK	21.0168	77.8197	1.88859	6.74087	5e-05	0.0123202	yes
Itgae	Itgae	Itgae	chr11:73090594-73147449	WT.replicate-1.bam	SKO.replicate-1.bam	OK	0.503906	10.0366	4.31597	6.79661	5e-05	0.0123202	yes
Klrk1	Klrk1	Klrk1	chr6:129610320-129623841	WT.replicate-1.bam	SKO.replicate-1.bam	OK	62.306	29.0791	-1.09939	-4.85363	5e-05	0.0123202	yes
Ldlrad4	Ldlrad4	Ldlrad4	chr18:67933256-68255549	WT.replicate-1.bam	SKO.replicate-1.bam	OK	0.761463	13.5583	4.15426	9.77206	5e-05	0.0123202	yes
Mgst2	Mgst2	Mgst2	chr3:51661192-51682675	WT.replicate-1.bam	SKO.replicate-1.bam	OK	15.3647	57.3809	1.90095	8.25767	5e-05	0.0123202	yes
Myc	Myc	Myc	chr15:61985340-61990361	WT.replicate-1.bam	SKO.replicate-1.bam	OK	34.7828	11.9496	-1.54141	-5.74053	5e-05	0.0123202	yes
Ncf4	Ncf4	Ncf4	chr15:78244810-78262580	WT.replicate-1.bam	SKO.replicate-1.bam	OK	109.451	370.232	1.75815	9.53198	5e-05	0.0123202	yes
Ncln	Ncln	Ncln	chr10:81486458-81496363	WT.replicate-1.bam	SKO.replicate-1.bam	OK	19.3766	7.16946	-1.43438	-6.33547	5e-05	0.0123202	yes
Ndfip1	Ndfip1	Ndfip1	chr18:38418974-38464406	WT.replicate-1.bam	SKO.replicate-1.bam	OK	60.913	22.3465	-1.4467	-6.52632	5e-05	0.0123202	yes
Necap2	Necap2	Necap2	chr4:141066511-141078345	WT.replicate-1.bam	SKO.replicate-1.bam	OK	77.9767	41.0405	-0.925994	-4.52236	5e-05	0.0123202	yes
Nt5e	Nt5e	Nt5e	chr9:88327608-88372089	WT.replicate-1.bam	SKO.replicate-1.bam	OK	4.71207	17.3183	1.87786	6.35708	5e-05	0.0123202	yes
Pgls	Pgls	Pgls	chr8:71592183-71596267	WT.replicate-1.bam	SKO.replicate-1.bam	OK	60.5665	15.2619	-1.98859	-10.3574	5e-05	0.0123202	yes
Pgrmc1	Pgrmc1	Pgrmc1	chrX:36598224-36606079	WT.replicate-1.bam	SKO.replicate-1.bam	OK	66.1048	34.0644	-0.95649	-3.96079	5e-05	0.0123202	yes
Plk1	Plk1	Plk1	chr7:122159436-122169875	WT.replicate-1.bam	SKO.replicate-1.bam	OK	183.609	88.3739	-1.05495	-5.71293	5e-05	0.0123202	yes
Pmepa1	Pmepa1	Pmepa1	chr2:173224464-173276533	WT.replicate-1.bam	SKO.replicate-1.bam	OK	0.352041	2.77742	2.97993	6.42673	5e-05	0.0123202	yes
Prpsap1	Prpsap1	Prpsap1	chr11:116470815-116490346	WT.replicate-1.bam	SKO.replicate-1.bam	OK	22.011	9.7598	-1.1733	-4.74988	5e-05	0.0123202	yes
Rcc1	Rcc1	Rcc1	chr4:132331918-132345750	WT.replicate-1.bam	SKO.replicate-1.bam	OK	79.555	37.1155	-1.09993	-4.73411	5e-05	0.0123202	yes
Sell	Sell	Sell	chr1:164062075-164080785	WT.replicate-1.bam	SKO.replicate-1.bam	OK	35.5751	15.2068	-1.22615	-4.8167	5e-05	0.0123202	yes
Sema4a	Sema4a	Sema4a	chr3:88435961-88461182	WT.replicate-1.bam	SKO.replicate-1.bam	OK	33.5168	16.8108	-0.9955	-4.00484	5e-05	0.0123202	yes
Serpinb9b	Serpinb9b	Serpinb9b	chr13:33027413-33040558	WT.replicate-1.bam	SKO.replicate-1.bam	OK	8.95947	2.45984	-1.86485	-4.80353	5e-05	0.0123202	yes
Sh2d3c	Sh2d3c	Sh2d3c	chr2:32721054-32755007	WT.replicate-1.bam	SKO.replicate-1.bam	OK	24.2852	11.3662	-1.09533	-4.53613	5e-05	0.0123202	yes
Ski	Ski	Ski	chr4:155154074-155222535	WT.replicate-1.bam	SKO.replicate-1.bam	OK	1.78628	5.44391	1.60768	5.68722	5e-05	0.0123202	yes
Skil	Skil	Skil	chr3:31095057-31122923	WT.replicate-1.bam	SKO.replicate-1.bam	OK	4.11643	15.2438	1.88876	7.51666	5e-05	0.0123202	yes
Slc2a3	Slc2a3	Slc2a3	chr6:122727808-122742745	WT.replicate-1.bam	SKO.replicate-1.bam	OK	24.1644	11.8356	-1.02975	-4.20021	5e-05	0.0123202	yes
Slc40a1	Slc40a1	Slc40a1	chr1:45908069-45925594	WT.replicate-1.bam	SKO.replicate-1.bam	OK	5.67307	14.6768	1.37133	4.5334	5e-05	0.0123202	yes
Smurf2	Smurf2	Smurf2	chr11:106820063-106920715	WT.replicate-1.bam	SKO.replicate-1.bam	OK	1.81706	5.89587	1.6981	5.19655	5e-05	0.0123202	yes
Snrpb	Snrpb	Snrpb	chr2:130171635-130179364	WT.replicate-1.bam	SKO.replicate-1.bam	OK	396.308	186.626	-1.08647	-6.31	5e-05	0.0123202	yes
Tap2	Tap2	Tap2	chr17:34204478-34216321	WT.replicate-1.bam	SKO.replicate-1.bam	OK	150.485	60.3092	-1.31917	-7.29501	5e-05	0.0123202	yes
Tex11	Tex11	Tex11	chrX:100838647-101059639	WT.replicate-1.bam	SKO.replicate-1.bam	OK	0	0.719931	inf	#NAME?	5e-05	0.0123202	yes
Trf	Trf	Trf	chr9:103208875-103230286	WT.replicate-1.bam	SKO.replicate-1.bam	OK	3.05493	8.14831	1.41536	4.35211	5e-05	0.0123202	yes
Ube2s	Ube2s	Ube2s	chr7:4808013-4812340	WT.replicate-1.bam	SKO.replicate-1.bam	OK	117.566	55.7102	-1.07746	-5.72132	5e-05	0.0123202	yes
Xcl1	Xcl1	Xcl1	chr1:164931647-164935510	WT.replicate-1.bam	SKO.replicate-1.bam	OK	44.4763	170.447	1.93822	10.2664	5e-05	0.0123202	yes
Ywhaq	Ywhaq	Ywhaq	chr12:21390328-21417436	WT.replicate-1.bam	SKO.replicate-1.bam	OK	321.356	171.656	-0.904652	-4.53153	5e-05	0.0123202	yes
Zfp1	Zfp1	Zfp1	chr8:111643442-111671011	WT.replicate-1.bam	SKO.replicate-1.bam	OK	2.97173	10.1589	1.77337	4.92861	5e-05	0.0123202	yes
2210016F16Rik	2210016F16Rik	2210016F16Rik	chr13:58380045-58385225	WT.replicate-2.bam	SKO.replicate-1.bam	OK	10.5195	3.49639	-1.58912	-5.35094	5e-05	0.0123202	yes
2310003H01Rik	2310003H01Rik	2310003H01Rik	chr11:120369561-120378746	WT.replicate-2.bam	SKO.replicate-1.bam	OK	9.63344	2.93311	-1.71562	-6.27461	5e-05	0.0123202	yes
AI467606	AI467606	AI467606	chr7:127091435-127094049	WT.replicate-2.bam	SKO.replicate-1.bam	OK	39.4612	19.2448	-1.03596	-4.41811	5e-05	0.0123202	yes
AW112010	AW112010	AW112010	chr19:11047611-11050566	WT.replicate-2.bam	SKO.replicate-1.bam	OK	1037.16	2051.5	0.984038	5.15776	5e-05	0.0123202	yes
Actn4	Actn4	Actn4	chr7:28881655-28962280	WT.replicate-2.bam	SKO.replicate-1.bam	OK	79.5713	40.4572	-0.975849	-4.29801	5e-05	0.0123202	yes
Adora2a	Adora2a	Adora2a	chr10:75316942-75334788	WT.replicate-2.bam	SKO.replicate-1.bam	OK	14.6428	5.39742	-1.43985	-5.89662	5e-05	0.0123202	yes
Adrm1	Adrm1	Adrm1	chr2:180171587-180176283	WT.replicate-2.bam	SKO.replicate-1.bam	OK	134.821	66.895	-1.01108	-5.67498	5e-05	0.0123202	yes
Ahr	Ahr	Ahr	chr12:35497978-35534989	WT.replicate-2.bam	SKO.replicate-1.bam	OK	0.516114	1.93402	1.90584	4.20496	5e-05	0.0123202	yes
Ak2	Ak2	Ak2	chr4:128993223-129011529	WT.replicate-2.bam	SKO.replicate-1.bam	OK	152.007	65.3397	-1.21811	-5.23723	5e-05	0.0123202	yes
Akna	Akna	Akna	chr4:63367127-63403445	WT.replicate-2.bam	SKO.replicate-1.bam	OK	30.135	14.0278	-1.10315	-5.02909	5e-05	0.0123202	yes
Amica1	Amica1	Amica1	chr9:45079182-45135606	WT.replicate-2.bam	SKO.replicate-1.bam	OK	17.8073	39.5888	1.15262	4.36379	5e-05	0.0123202	yes
Ap3m2	Ap3m2	Ap3m2	chr8:22787353-22805654	WT.replicate-2.bam	SKO.replicate-1.bam	OK	2.97389	7.14646	1.26488	3.91155	5e-05	0.0123202	yes
Apol7e	Apol7e	Apol7e	chr15:77698888-77719288	WT.replicate-2.bam	SKO.replicate-1.bam	OK	1.83162	7.03697	1.94183	4.82014	5e-05	0.0123202	yes
Arhgef1	Arhgef1	Arhgef1	chr7:24902985-24926591	WT.replicate-2.bam	SKO.replicate-1.bam	OK	21.596	10.5774	-1.02977	-3.90578	5e-05	0.0123202	yes
Atad3a	Atad3a	Atad3a	chr4:155740639-155761098	WT.replicate-2.bam	SKO.replicate-1.bam	OK	14.726	6.04503	-1.28455	-5.01468	5e-05	0.0123202	yes
Bin2	Bin2	Bin2	chr15:100641081-100669500	WT.replicate-2.bam	SKO.replicate-1.bam	OK	224.176	105.073	-1.09324	-5.55487	5e-05	0.0123202	yes
Bop1	Bop1	Bop1	chr15:76380512-76477269	WT.replicate-2.bam	SKO.replicate-1.bam	OK	66.6535	23.9541	-1.47641	-6.23302	5e-05	0.0123202	yes
Btg1	Btg1	Btg1	chr10:96617000-96622811	WT.replicate-2.bam	SKO.replicate-1.bam	OK	17.8452	32.6531	0.871686	3.34769	5e-05	0.0123202	yes
Car2	Car2	Car2	chr3:14886425-14900770	WT.replicate-2.bam	SKO.replicate-1.bam	OK	49.6288	119.636	1.26941	5.95666	5e-05	0.0123202	yes
Ccdc124	Ccdc124	Ccdc124	chr8:70868226-70873490	WT.replicate-2.bam	SKO.replicate-1.bam	OK	231.228	101.706	-1.18491	-8.31666	5e-05	0.0123202	yes
Cct6a	Cct6a	Cct6a	chr5:129787384-129794500	WT.replicate-2.bam	SKO.replicate-1.bam	OK	202.298	100.166	-1.01409	-4.6975	5e-05	0.0123202	yes
Cd5l	Cd5l	Cd5l	chr3:87357880-87371074	WT.replicate-2.bam	SKO.replicate-1.bam	OK	1.97418	7.35895	1.89825	5.06553	5e-05	0.0123202	yes
Cd69	Cd69	Cd69	chr6:129267324-129275369	WT.replicate-2.bam	SKO.replicate-1.bam	OK	120.496	220.721	0.873241	3.61893	5e-05	0.0123202	yes
Cd7	Cd7	Cd7	chr11:121036748-121039478	WT.replicate-2.bam	SKO.replicate-1.bam	OK	73.5105	196.38	1.41762	7.10802	5e-05	0.0123202	yes
Cd74	Cd74	Cd74	chr18:60803848-60812652	WT.replicate-2.bam	SKO.replicate-1.bam	OK	19.2274	69.984	1.86386	6.80037	5e-05	0.0123202	yes
Cd86	Cd86	Cd86	chr16:36603868-36666077	WT.replicate-2.bam	SKO.replicate-1.bam	OK	1.82105	7.43487	2.02954	4.93296	5e-05	0.0123202	yes
Cd96	Cd96	Cd96	chr16:46035656-46120248	WT.replicate-2.bam	SKO.replicate-1.bam	OK	20.6088	42.9477	1.05932	3.96476	5e-05	0.0123202	yes
Chchd10	Chchd10	Chchd10	chr10:75935572-75937734	WT.replicate-2.bam	SKO.replicate-1.bam	OK	22.7137	5.46987	-2.05398	-8.50157	5e-05	0.0123202	yes
Cherp	Cherp	Cherp	chr8:72443879-72475233	WT.replicate-2.bam	SKO.replicate-1.bam	OK	20.1891	7.49127	-1.4303	-5.06862	5e-05	0.0123202	yes
Clec12a	Clec12a	Clec12a	chr6:129350243-129365303	WT.replicate-2.bam	SKO.replicate-1.bam	OK	0.8289	4.62481	2.48012	4.72163	5e-05	0.0123202	yes
Csk	Csk	Csk	chr9:57626645-57645180	WT.replicate-2.bam	SKO.replicate-1.bam	OK	66.5958	30.973	-1.10442	-5.29779	5e-05	0.0123202	yes
Ctss	Ctss	Ctss	chr3:95526785-95556403	WT.replicate-2.bam	SKO.replicate-1.bam	OK	58.5889	135.179	1.20617	5.12232	5e-05	0.0123202	yes
Ctsw	Ctsw	Ctsw	chr19:5465239-5468498	WT.replicate-2.bam	SKO.replicate-1.bam	OK	318.358	547.19	0.78139	4.23116	5e-05	0.0123202	yes
Ddx54	Ddx54	Ddx54	chr5:120613129-120634235	WT.replicate-2.bam	SKO.replicate-1.bam	OK	12.4107	3.98953	-1.63729	-5.56087	5e-05	0.0123202	yes
Dnm2	Dnm2	Dnm2	chr9:21424907-21510186	WT.replicate-2.bam	SKO.replicate-1.bam	OK	42.3853	17.5333	-1.27346	-5.51331	5e-05	0.0123202	yes
Dnph1	Dnph1	Dnph1	chr17:46496788-46499618	WT.replicate-2.bam	SKO.replicate-1.bam	OK	38.81	13.9893	-1.47211	-6.25984	5e-05	0.0123202	yes
Edem2	Edem2	Edem2	chr2:155701672-155729475	WT.replicate-2.bam	SKO.replicate-1.bam	OK	34.6109	15.4059	-1.16775	-5.03059	5e-05	0.0123202	yes
Eomes	Eomes	Eomes	chr9:118478188-118486132	WT.replicate-2.bam	SKO.replicate-1.bam	OK	5.00527	1.48029	-1.75757	-4.73898	5e-05	0.0123202	yes
Fasn	Fasn	Fasn	chr11:120805957-120824547	WT.replicate-2.bam	SKO.replicate-1.bam	OK	7.34062	2.88983	-1.34492	-5.71783	5e-05	0.0123202	yes
Fdxr	Fdxr	Fdxr	chr11:115268024-115276969	WT.replicate-2.bam	SKO.replicate-1.bam	OK	25.0073	11.1214	-1.16902	-5.16803	5e-05	0.0123202	yes
Fkbp8	Fkbp8	Fkbp8	chr8:70527742-70535328	WT.replicate-2.bam	SKO.replicate-1.bam	OK	81.2763	38.8284	-1.06572	-4.37513	5e-05	0.0123202	yes
Fpgs	Fpgs	Fpgs	chr2:32646594-32694175	WT.replicate-2.bam	SKO.replicate-1.bam	OK	9.14972	2.95338	-1.63136	-4.48209	5e-05	0.0123202	yes
Galk1	Galk1	Galk1	chr11:115974724-116012719	WT.replicate-2.bam	SKO.replicate-1.bam	OK	40.7593	15.4544	-1.39912	-4.85604	5e-05	0.0123202	yes
Gimap7	Gimap7	Gimap7	chr6:48718620-48724636	WT.replicate-2.bam	SKO.replicate-1.bam	OK	114.173	50.2358	-1.18443	-5.18288	5e-05	0.0123202	yes
Gpr68	Gpr68	Gpr68	chr12:100876681-100908198	WT.replicate-2.bam	SKO.replicate-1.bam	OK	15.0719	34.3969	1.19042	4.85783	5e-05	0.0123202	yes
Gzma	Gzma	Gzma	chr13:113093826-113100981	WT.replicate-2.bam	SKO.replicate-1.bam	OK	998.131	2164.6	1.1168	5.50917	5e-05	0.0123202	yes
Gzmk	Gzmk	Gzmk	chr13:113171873-113180897	WT.replicate-2.bam	SKO.replicate-1.bam	OK	240.807	533.697	1.14814	6.38972	5e-05	0.0123202	yes
H13	H13	H13	chr2:152669460-152708668	WT.replicate-2.bam	SKO.replicate-1.bam	OK	18.835	6.42423	-1.55182	-5.68934	5e-05	0.0123202	yes
H2-Aa	H2-Aa	H2-Aa	chr17:34282750-34287771	WT.replicate-2.bam	SKO.replicate-1.bam	OK	6.99092	33.4403	2.25803	7.87726	5e-05	0.0123202	yes
H2-Q10	H2-Q10	H2-Q10	chr17:35470088-35474563	WT.replicate-2.bam	SKO.replicate-1.bam	OK	41.1861	11.5892	-1.82938	-7.87833	5e-05	0.0123202	yes
Herc3	Herc3	Herc3	chr6:58833699-58920396	WT.replicate-2.bam	SKO.replicate-1.bam	OK	3.08754	7.64656	1.30835	4.19196	5e-05	0.0123202	yes
Hmga1	Hmga1	Hmga1	chr17:27556573-27563672	WT.replicate-2.bam	SKO.replicate-1.bam	OK	256.307	39.2072	-2.70868	-8.64506	5e-05	0.0123202	yes
Hnrnpm	Hnrnpm	Hnrnpm	chr17:33646232-33685458	WT.replicate-2.bam	SKO.replicate-1.bam	OK	185.704	85.2403	-1.12339	-5.00402	5e-05	0.0123202	yes
Ifi27l1	Ifi27l1	Ifi27l1	chr12:103434188-103440245	WT.replicate-2.bam	SKO.replicate-1.bam	OK	150.483	287.71	0.935012	4.0596	5e-05	0.0123202	yes
Ifi27l2a	Ifi27l2a	Ifi27l2a	chr12:103442166-103443680	WT.replicate-2.bam	SKO.replicate-1.bam	OK	598.043	1342.49	1.16659	8.6483	5e-05	0.0123202	yes
Ifit3	Ifit3	Ifit3	chr19:34583528-34588982	WT.replicate-2.bam	SKO.replicate-1.bam	OK	3.84954	13.5066	1.8109	5.34584	5e-05	0.0123202	yes
Ifitm1	Ifitm1	Ifitm1	chr7:140967428-140969827	WT.replicate-2.bam	SKO.replicate-1.bam	OK	460.642	1433.76	1.63809	7.37252	5e-05	0.0123202	yes
Ifitm2	Ifitm2	Ifitm2	chr7:140954838-140955961	WT.replicate-2.bam	SKO.replicate-1.bam	OK	86.6551	310.01	1.83896	10.7037	5e-05	0.0123202	yes
Ifitm3	Ifitm3	Ifitm3	chr7:141009589-141010744	WT.replicate-2.bam	SKO.replicate-1.bam	OK	73.3136	160.629	1.13158	6.43947	5e-05	0.0123202	yes
Ifrd2	Ifrd2	Ifrd2	chr9:107587717-107593038	WT.replicate-2.bam	SKO.replicate-1.bam	OK	28.3695	10.6155	-1.41817	-6.28776	5e-05	0.0123202	yes
Igflr1	Igflr1	Igflr1	chr7:30565426-30567962	WT.replicate-2.bam	SKO.replicate-1.bam	OK	15.3561	47.2559	1.62168	7.04581	5e-05	0.0123202	yes
Igj	Igj	Igj	chr5:88519808-88527897	WT.replicate-2.bam	SKO.replicate-1.bam	OK	0	1.19973	inf	#NAME?	5e-05	0.0123202	yes
Il7r	Il7r	Il7r	chr15:9506158-9529876	WT.replicate-2.bam	SKO.replicate-1.bam	OK	5.39405	16.0152	1.57	4.82308	5e-05	0.0123202	yes
Irf1	Irf1	Irf1	chr11:53770013-53778374	WT.replicate-2.bam	SKO.replicate-1.bam	OK	152.528	278.058	0.866312	3.94555	5e-05	0.0123202	yes
Isg20	Isg20	Isg20	chr7:78913764-78920396	WT.replicate-2.bam	SKO.replicate-1.bam	OK	22.6748	77.8197	1.77904	6.33583	5e-05	0.0123202	yes
Itgae	Itgae	Itgae	chr11:73090594-73147449	WT.replicate-2.bam	SKO.replicate-1.bam	OK	0.54309	10.0366	4.20793	6.6684	5e-05	0.0123202	yes
Itm2c	Itm2c	Itm2c	chr1:85894509-85908698	WT.replicate-2.bam	SKO.replicate-1.bam	OK	22.8233	10.1277	-1.1722	-5.13241	5e-05	0.0123202	yes
Klhl6	Klhl6	Klhl6	chr16:19946491-19983049	WT.replicate-2.bam	SKO.replicate-1.bam	OK	84.269	180.12	1.09588	4.80538	5e-05	0.0123202	yes
Ldlrad4	Ldlrad4	Ldlrad4	chr18:67933256-68255549	WT.replicate-2.bam	SKO.replicate-1.bam	OK	1.13989	13.5583	3.57221	9.39907	5e-05	0.0123202	yes
Lgals9	Lgals9	Lgals9	chr11:78962978-78984924	WT.replicate-2.bam	SKO.replicate-1.bam	OK	144.048	254.411	0.82061	3.69983	5e-05	0.0123202	yes
Lmnb1	Lmnb1	Lmnb1	chr18:56707812-56753424	WT.replicate-2.bam	SKO.replicate-1.bam	OK	39.487	18.9509	-1.05911	-4.89294	5e-05	0.0123202	yes
Lrwd1	Lrwd1	Lrwd1	chr5:136123065-136136074	WT.replicate-2.bam	SKO.replicate-1.bam	OK	71.5989	33.2175	-1.10799	-5.68479	5e-05	0.0123202	yes
Ly6d	Ly6d	Ly6d	chr15:74762055-74763567	WT.replicate-2.bam	SKO.replicate-1.bam	OK	0	7.26792	inf	#NAME?	5e-05	0.0123202	yes
Malat1	Malat1	Malat1	chr19:5795689-5802671	WT.replicate-2.bam	SKO.replicate-1.bam	OK	82.1428	146.956	0.839178	3.26125	5e-05	0.0123202	yes
Mettl13	Mettl13	Mettl13	chr1:162533671-162548345	WT.replicate-2.bam	SKO.replicate-1.bam	OK	8.46949	3.22873	-1.39131	-4.77171	5e-05	0.0123202	yes
Mgst2	Mgst2	Mgst2	chr3:51661192-51682675	WT.replicate-2.bam	SKO.replicate-1.bam	OK	11.0081	57.3809	2.38201	9.64584	5e-05	0.0123202	yes
Mrpl38	Mrpl38	Mrpl38	chr11:116131816-116138868	WT.replicate-2.bam	SKO.replicate-1.bam	OK	18.3334	6.26014	-1.55021	-6.24922	5e-05	0.0123202	yes
Mrps12	Mrps12	Mrps12	chr7:28739640-28741781	WT.replicate-2.bam	SKO.replicate-1.bam	OK	168.305	74.2339	-1.18092	-7.69335	5e-05	0.0123202	yes
Mthfd1	Mthfd1	Mthfd1	chr12:76255231-76319820	WT.replicate-2.bam	SKO.replicate-1.bam	OK	60.8788	28.4462	-1.09771	-5.10258	5e-05	0.0123202	yes
Myc	Myc	Myc	chr15:61985340-61990361	WT.replicate-2.bam	SKO.replicate-1.bam	OK	44.816	11.9496	-1.90705	-7.18021	5e-05	0.0123202	yes
Ncf4	Ncf4	Ncf4	chr15:78244810-78262580	WT.replicate-2.bam	SKO.replicate-1.bam	OK	109.069	370.232	1.76319	9.69342	5e-05	0.0123202	yes
Ncln	Ncln	Ncln	chr10:81486458-81496363	WT.replicate-2.bam	SKO.replicate-1.bam	OK	26.3155	7.16946	-1.87598	-8.52141	5e-05	0.0123202	yes
Ndfip1	Ndfip1	Ndfip1	chr18:38418974-38464406	WT.replicate-2.bam	SKO.replicate-1.bam	OK	80.6485	22.3465	-1.8516	-8.41029	5e-05	0.0123202	yes
Neat1	Neat1	Neat1	chr19:5842301-5845478	WT.replicate-2.bam	SKO.replicate-1.bam	OK	14.8828	29.5325	0.988656	4.16254	5e-05	0.0123202	yes
Necap2	Necap2	Necap2	chr4:141066511-141078345	WT.replicate-2.bam	SKO.replicate-1.bam	OK	90.4762	41.0405	-1.14049	-5.63165	5e-05	0.0123202	yes
Nfkbib	Nfkbib	Nfkbib	chr7:28756173-28766524	WT.replicate-2.bam	SKO.replicate-1.bam	OK	35.2123	15.6404	-1.1708	-4.2894	5e-05	0.0123202	yes
Nt5e	Nt5e	Nt5e	chr9:88327608-88372089	WT.replicate-2.bam	SKO.replicate-1.bam	OK	4.18327	17.3183	2.04959	6.77841	5e-05	0.0123202	yes
Os9	Os9	Os9	chr10:127094258-127121160	WT.replicate-2.bam	SKO.replicate-1.bam	OK	28.9336	14.8969	-0.95774	-3.96557	5e-05	0.0123202	yes
Pfkl	Pfkl	Pfkl	chr10:77986948-78009796	WT.replicate-2.bam	SKO.replicate-1.bam	OK	45.5561	21.1737	-1.10537	-5.38127	5e-05	0.0123202	yes
Pgls	Pgls	Pgls	chr8:71592183-71596267	WT.replicate-2.bam	SKO.replicate-1.bam	OK	73.2169	15.2619	-2.26225	-12.0355	5e-05	0.0123202	yes
Piezo1	Piezo1	Piezo1	chr8:122476142-122551329	WT.replicate-2.bam	SKO.replicate-1.bam	OK	4.89761	1.84076	-1.41178	-4.24702	5e-05	0.0123202	yes
Plcxd2	Plcxd2	Plcxd2	chr16:45959260-46010413	WT.replicate-2.bam	SKO.replicate-1.bam	OK	1.4773	3.48884	1.23979	3.55778	5e-05	0.0123202	yes
Plk1	Plk1	Plk1	chr7:122159436-122169875	WT.replicate-2.bam	SKO.replicate-1.bam	OK	220.124	88.3739	-1.31663	-7.22166	5e-05	0.0123202	yes
Pmepa1	Pmepa1	Pmepa1	chr2:173224464-173276533	WT.replicate-2.bam	SKO.replicate-1.bam	OK	0.539139	2.77742	2.36501	5.65194	5e-05	0.0123202	yes
Pold1	Pold1	Pold1	chr7:44532743-44548815	WT.replicate-2.bam	SKO.replicate-1.bam	OK	48.2974	20.4125	-1.24249	-6.76978	5e-05	0.0123202	yes
Pold2	Pold2	Pold2	chr11:5861865-5878256	WT.replicate-2.bam	SKO.replicate-1.bam	OK	99.0111	53.602	-0.885303	-3.6939	5e-05	0.0123202	yes
Ppan	Ppan	Ppan	chr9:20888174-20892179	WT.replicate-2.bam	SKO.replicate-1.bam	OK	21.5411	5.74634	-1.90637	-7.73624	5e-05	0.0123202	yes
Ppif	Ppif	Ppif	chr14:25694169-25701282	WT.replicate-2.bam	SKO.replicate-1.bam	OK	30.7939	13.8046	-1.1575	-4.86361	5e-05	0.0123202	yes
Ppp5c	Ppp5c	Ppp5c	chr7:17004640-17027914	WT.replicate-2.bam	SKO.replicate-1.bam	OK	35.8565	16.2778	-1.13933	-5.25568	5e-05	0.0123202	yes
Prep	Prep	Prep	chr10:45067213-45158995	WT.replicate-2.bam	SKO.replicate-1.bam	OK	31.4779	13.0726	-1.26779	-5.50412	5e-05	0.0123202	yes
Prpsap1	Prpsap1	Prpsap1	chr11:116470815-116490346	WT.replicate-2.bam	SKO.replicate-1.bam	OK	28.0721	9.7598	-1.52421	-6.31459	5e-05	0.0123202	yes
Pspc1	Pspc1	Pspc1	chr14:56722448-56778316	WT.replicate-2.bam	SKO.replicate-1.bam	OK	18.1554	7.58493	-1.25919	-4.51588	5e-05	0.0123202	yes
Ptprcap	Ptprcap	Ptprcap	chr19:4154645-4156710	WT.replicate-2.bam	SKO.replicate-1.bam	OK	623.287	336.897	-0.887589	-6.23548	5e-05	0.0123202	yes
Rab1b	Rab1b	Rab1b	chr19:5099206-5106996	WT.replicate-2.bam	SKO.replicate-1.bam	OK	77.2596	36.0337	-1.10037	-5.62021	5e-05	0.0123202	yes
Rae1	Rae1	Rae1	chr2:173000116-173015739	WT.replicate-2.bam	SKO.replicate-1.bam	OK	37.1817	16.1671	-1.20154	-5.16534	5e-05	0.0123202	yes
Rangap1	Rangap1	Rangap1	chr15:81704247-81729919	WT.replicate-2.bam	SKO.replicate-1.bam	OK	66.7888	36.4594	-0.873317	-3.80173	5e-05	0.0123202	yes
Rbck1	Rbck1	Rbck1	chr2:152316333-152332639	WT.replicate-2.bam	SKO.replicate-1.bam	OK	38.32	17.4726	-1.133	-4.40621	5e-05	0.0123202	yes
Rbm14	Rbm14	Rbm14	chr19:4800924-4811634	WT.replicate-2.bam	SKO.replicate-1.bam	OK	50.5679	23.2193	-1.1229	-5.88753	5e-05	0.0123202	yes
Rbm38	Rbm38	Rbm38	chr2:173021901-173034731	WT.replicate-2.bam	SKO.replicate-1.bam	OK	59.5042	25.611	-1.21623	-6.33436	5e-05	0.0123202	yes
Rcc1	Rcc1	Rcc1	chr4:132331918-132345750	WT.replicate-2.bam	SKO.replicate-1.bam	OK	96.7457	37.1155	-1.38217	-5.95549	5e-05	0.0123202	yes
Rpph1	Rpph1	Rpph1	chr14:50807446-50807771	WT.replicate-2.bam	SKO.replicate-1.bam	OK	704.466	233.753	-1.59155	-18.9406	5e-05	0.0123202	yes
Rrp1	Rrp1	Rrp1	chr10:78400361-78413043	WT.replicate-2.bam	SKO.replicate-1.bam	OK	72.837	39.5227	-0.88199	-4.1961	5e-05	0.0123202	yes
Rrp15	Rrp15	Rrp15	chr1:186721086-186749358	WT.replicate-2.bam	SKO.replicate-1.bam	OK	40.5701	18.4823	-1.13427	-4.62477	5e-05	0.0123202	yes
Rtp4	Rtp4	Rtp4	chr16:23609918-23614222	WT.replicate-2.bam	SKO.replicate-1.bam	OK	17.4787	56.8296	1.70105	6.42098	5e-05	0.0123202	yes
Ruvbl1	Ruvbl1	Ruvbl1	chr6:88465422-88497566	WT.replicate-2.bam	SKO.replicate-1.bam	OK	130.789	60.1684	-1.12017	-5.39781	5e-05	0.0123202	yes
Sdf2l1	Sdf2l1	Sdf2l1	chr16:17130137-17132383	WT.replicate-2.bam	SKO.replicate-1.bam	OK	143.552	64.7916	-1.1477	-6.94205	5e-05	0.0123202	yes
Sema4a	Sema4a	Sema4a	chr3:88435961-88461182	WT.replicate-2.bam	SKO.replicate-1.bam	OK	41.5833	16.8108	-1.30662	-5.31389	5e-05	0.0123202	yes
Serinc3	Serinc3	Serinc3	chr2:163623272-163645800	WT.replicate-2.bam	SKO.replicate-1.bam	OK	21.9123	48.2046	1.13743	4.22903	5e-05	0.0123202	yes
Sh2d3c	Sh2d3c	Sh2d3c	chr2:32721054-32755007	WT.replicate-2.bam	SKO.replicate-1.bam	OK	29.0671	11.3662	-1.35464	-5.68798	5e-05	0.0123202	yes
Shmt2	Shmt2	Shmt2	chr10:127514938-127522444	WT.replicate-2.bam	SKO.replicate-1.bam	OK	181.419	92.4368	-0.97279	-4.32738	5e-05	0.0123202	yes
Skil	Skil	Skil	chr3:31095057-31122923	WT.replicate-2.bam	SKO.replicate-1.bam	OK	3.95969	15.2438	1.94476	7.73564	5e-05	0.0123202	yes
Slc40a1	Slc40a1	Slc40a1	chr1:45908069-45925594	WT.replicate-2.bam	SKO.replicate-1.bam	OK	4.64449	14.6768	1.65994	5.27807	5e-05	0.0123202	yes
Smurf2	Smurf2	Smurf2	chr11:106820063-106920715	WT.replicate-2.bam	SKO.replicate-1.bam	OK	2.26918	5.89587	1.37753	4.30508	5e-05	0.0123202	yes
Snrpa	Snrpa	Snrpa	chr7:27187005-27204320	WT.replicate-2.bam	SKO.replicate-1.bam	OK	112.734	55.4861	-1.02272	-5.53092	5e-05	0.0123202	yes
Snrpb	Snrpb	Snrpb	chr2:130171635-130179364	WT.replicate-2.bam	SKO.replicate-1.bam	OK	489.702	186.626	-1.39175	-8.19254	5e-05	0.0123202	yes
Srgn	Srgn	Srgn	chr10:62494427-62507755	WT.replicate-2.bam	SKO.replicate-1.bam	OK	452.811	848.173	0.905449	4.55311	5e-05	0.0123202	yes
Srrt	Srrt	Srrt	chr5:137295703-137307674	WT.replicate-2.bam	SKO.replicate-1.bam	OK	43.1483	18.083	-1.25467	-5.1111	5e-05	0.0123202	yes
Stat1	Stat1	Stat1	chr1:52119437-52161865	WT.replicate-2.bam	SKO.replicate-1.bam	OK	41.6644	80.6875	0.953531	4.30476	5e-05	0.0123202	yes
Tap2	Tap2	Tap2	chr17:34204478-34216321	WT.replicate-2.bam	SKO.replicate-1.bam	OK	168.814	60.3092	-1.48499	-8.3409	5e-05	0.0123202	yes
Tars	Tars	Tars	chr15:11383662-11399658	WT.replicate-2.bam	SKO.replicate-1.bam	OK	91.07	48.0263	-0.92315	-4.35338	5e-05	0.0123202	yes
Tbrg4	Tbrg4	Tbrg4	chr11:6615597-6626067	WT.replicate-2.bam	SKO.replicate-1.bam	OK	46.5464	22.3134	-1.06076	-4.24885	5e-05	0.0123202	yes
Tcof1	Tcof1	Tcof1	chr18:60813755-60848964	WT.replicate-2.bam	SKO.replicate-1.bam	OK	31.4321	13.844	-1.18297	-4.89471	5e-05	0.0123202	yes
Tcp11l2	Tcp11l2	Tcp11l2	chr10:84576946-84614355	WT.replicate-2.bam	SKO.replicate-1.bam	OK	13.4638	29.7444	1.14353	4.22069	5e-05	0.0123202	yes
Tex11	Tex11	Tex11	chrX:100838647-101059639	WT.replicate-2.bam	SKO.replicate-1.bam	OK	0	0.719931	inf	#NAME?	5e-05	0.0123202	yes
Thop1	Thop1	Thop1	chr10:81070082-81082360	WT.replicate-2.bam	SKO.replicate-1.bam	OK	8.24947	1.72762	-2.25551	-7.33526	5e-05	0.0123202	yes
Trf	Trf	Trf	chr9:103208875-103230286	WT.replicate-2.bam	SKO.replicate-1.bam	OK	2.0587	8.14831	1.98477	5.69929	5e-05	0.0123202	yes
Triobp	Triobp	Triobp	chr15:78947723-79011041	WT.replicate-2.bam	SKO.replicate-1.bam	OK	10.5316	4.30251	-1.29147	-3.94922	5e-05	0.0123202	yes
Trp53inp1	Trp53inp1	Trp53inp1	chr4:11156440-11174377	WT.replicate-2.bam	SKO.replicate-1.bam	OK	1.57517	4.67855	1.57055	5.12884	5e-05	0.0123202	yes
Tsc22d3	Tsc22d3	Tsc22d3	chrX:140539528-140600522	WT.replicate-2.bam	SKO.replicate-1.bam	OK	79.3951	167.711	1.07885	4.76592	5e-05	0.0123202	yes
Tssc4	Tssc4	Tssc4	chr7:143069367-143071087	WT.replicate-2.bam	SKO.replicate-1.bam	OK	56.1056	22.6849	-1.30641	-4.80391	5e-05	0.0123202	yes
Ube2s	Ube2s	Ube2s	chr7:4808013-4812340	WT.replicate-2.bam	SKO.replicate-1.bam	OK	157.485	55.7102	-1.4992	-8.16323	5e-05	0.0123202	yes
Usp18	Usp18	Usp18	chr6:121245905-121270917	WT.replicate-2.bam	SKO.replicate-1.bam	OK	8.61033	22.6064	1.39259	5.07313	5e-05	0.0123202	yes
Vcam1	Vcam1	Vcam1	chr3:116110019-116129688	WT.replicate-2.bam	SKO.replicate-1.bam	OK	3.03241	9.42452	1.63595	4.84803	5e-05	0.0123202	yes
Wasf2	Wasf2	Wasf2	chr4:133130632-133198330	WT.replicate-2.bam	SKO.replicate-1.bam	OK	9.26303	4.18411	-1.14656	-4.18355	5e-05	0.0123202	yes
Wdr4	Wdr4	Wdr4	chr17:31494321-31512487	WT.replicate-2.bam	SKO.replicate-1.bam	OK	14.6536	5.60575	-1.38628	-5.49861	5e-05	0.0123202	yes
Xcl1	Xcl1	Xcl1	chr1:164931647-164935510	WT.replicate-2.bam	SKO.replicate-1.bam	OK	58.6099	170.447	1.54011	8.46868	5e-05	0.0123202	yes
Xrcc1	Xrcc1	Xrcc1	chr7:24547149-24573438	WT.replicate-2.bam	SKO.replicate-1.bam	OK	15.5085	5.18498	-1.58065	-6.05651	5e-05	0.0123202	yes
Ywhaq	Ywhaq	Ywhaq	chr12:21390328-21417436	WT.replicate-2.bam	SKO.replicate-1.bam	OK	313.059	171.656	-0.866916	-4.29313	5e-05	0.0123202	yes
Zbp1	Zbp1	Zbp1	chr2:173206611-173218922	WT.replicate-2.bam	SKO.replicate-1.bam	OK	57.4358	123.456	1.10397	4.21438	5e-05	0.0123202	yes
Zfp1	Zfp1	Zfp1	chr8:111643442-111671011	WT.replicate-2.bam	SKO.replicate-1.bam	OK	2.92077	10.1589	1.79832	4.97282	5e-05	0.0123202	yes
2310003H01Rik	2310003H01Rik	2310003H01Rik	chr11:120369561-120378746	WT.replicate-3.bam	SKO.replicate-1.bam	OK	10.6123	2.93311	-1.85524	-6.72828	5e-05	0.0123202	yes
AI467606	AI467606	AI467606	chr7:127091435-127094049	WT.replicate-3.bam	SKO.replicate-1.bam	OK	55.8301	19.2448	-1.53657	-6.61698	5e-05	0.0123202	yes
Actb	Actb	Actb	chr5:142903115-142906724	WT.replicate-3.bam	SKO.replicate-1.bam	OK	12989.9	15011.6	0.208692	74.7413	5e-05	0.0123202	yes
Ak2	Ak2	Ak2	chr4:128993223-129011529	WT.replicate-3.bam	SKO.replicate-1.bam	OK	153.537	65.3397	-1.23255	-5.31314	5e-05	0.0123202	yes
Baiap3	Baiap3	Baiap3	chr17:25240169-25256364	WT.replicate-3.bam	SKO.replicate-1.bam	OK	27.9965	10.9191	-1.35839	-4.83047	5e-05	0.0123202	yes
Bin2	Bin2	Bin2	chr15:100641081-100669500	WT.replicate-3.bam	SKO.replicate-1.bam	OK	205.827	105.073	-0.970038	-4.81397	5e-05	0.0123202	yes
Bop1	Bop1	Bop1	chr15:76380512-76477269	WT.replicate-3.bam	SKO.replicate-1.bam	OK	68.0112	23.9541	-1.5055	-6.38969	5e-05	0.0123202	yes
Btg1	Btg1	Btg1	chr10:96617000-96622811	WT.replicate-3.bam	SKO.replicate-1.bam	OK	15.6964	32.6531	1.05679	4.16378	5e-05	0.0123202	yes
Car2	Car2	Car2	chr3:14886425-14900770	WT.replicate-3.bam	SKO.replicate-1.bam	OK	49.4438	119.636	1.27479	5.99748	5e-05	0.0123202	yes
Ccl3	Ccl3	Ccl3	chr11:83647842-83649378	WT.replicate-3.bam	SKO.replicate-1.bam	OK	42.2384	15.2474	-1.46999	-5.76518	5e-05	0.0123202	yes
Cct6a	Cct6a	Cct6a	chr5:129787384-129794500	WT.replicate-3.bam	SKO.replicate-1.bam	OK	211.014	100.166	-1.07495	-5.00206	5e-05	0.0123202	yes
Cd5l	Cd5l	Cd5l	chr3:87357880-87371074	WT.replicate-3.bam	SKO.replicate-1.bam	OK	1.55532	7.35895	2.24228	5.66489	5e-05	0.0123202	yes
Cd7	Cd7	Cd7	chr11:121036748-121039478	WT.replicate-3.bam	SKO.replicate-1.bam	OK	89.3109	196.38	1.13674	5.71071	5e-05	0.0123202	yes
Cd74	Cd74	Cd74	chr18:60803848-60812652	WT.replicate-3.bam	SKO.replicate-1.bam	OK	18.65	69.984	1.90785	6.99287	5e-05	0.0123202	yes
Chchd10	Chchd10	Chchd10	chr10:75935572-75937734	WT.replicate-3.bam	SKO.replicate-1.bam	OK	20.2822	5.46987	-1.89064	-7.65658	5e-05	0.0123202	yes
Cherp	Cherp	Cherp	chr8:72443879-72475233	WT.replicate-3.bam	SKO.replicate-1.bam	OK	22.9333	7.49127	-1.61416	-5.76562	5e-05	0.0123202	yes
Cish	Cish	Cish	chr9:107296688-107301961	WT.replicate-3.bam	SKO.replicate-1.bam	OK	14.3134	34.8223	1.28264	5.80382	5e-05	0.0123202	yes
Clec12a	Clec12a	Clec12a	chr6:129350243-129365303	WT.replicate-3.bam	SKO.replicate-1.bam	OK	0.508505	4.62481	3.18506	5.43825	5e-05	0.0123202	yes
Coq4	Coq4	Coq4	chr2:29788262-29797743	WT.replicate-3.bam	SKO.replicate-1.bam	OK	7.56955	2.38961	-1.66343	-4.71421	5e-05	0.0123202	yes
Coro2a	Coro2a	Coro2a	chr4:46536936-46601929	WT.replicate-3.bam	SKO.replicate-1.bam	OK	3.85025	10.1713	1.40148	4.80545	5e-05	0.0123202	yes
Ctss	Ctss	Ctss	chr3:95526785-95556403	WT.replicate-3.bam	SKO.replicate-1.bam	OK	59.1381	135.179	1.19271	5.05922	5e-05	0.0123202	yes
Dnm2	Dnm2	Dnm2	chr9:21424907-21510186	WT.replicate-3.bam	SKO.replicate-1.bam	OK	40.9919	17.5333	-1.22524	-5.23183	5e-05	0.0123202	yes
Dnph1	Dnph1	Dnph1	chr17:46496788-46499618	WT.replicate-3.bam	SKO.replicate-1.bam	OK	44.5911	13.9893	-1.67244	-7.18793	5e-05	0.0123202	yes
Edem2	Edem2	Edem2	chr2:155701672-155729475	WT.replicate-3.bam	SKO.replicate-1.bam	OK	37.357	15.4059	-1.27789	-5.49063	5e-05	0.0123202	yes
Eomes	Eomes	Eomes	chr9:118478188-118486132	WT.replicate-3.bam	SKO.replicate-1.bam	OK	5.3133	1.48029	-1.84373	-4.95395	5e-05	0.0123202	yes
Exd2	Exd2	Exd2	chr12:80463094-80498135	WT.replicate-3.bam	SKO.replicate-1.bam	OK	8.00314	3.47439	-1.20381	-3.82835	5e-05	0.0123202	yes
Fdxr	Fdxr	Fdxr	chr11:115268024-115276969	WT.replicate-3.bam	SKO.replicate-1.bam	OK	25.7766	11.1214	-1.21273	-5.2868	5e-05	0.0123202	yes
Gimap7	Gimap7	Gimap7	chr6:48718620-48724636	WT.replicate-3.bam	SKO.replicate-1.bam	OK	126.999	50.2358	-1.33803	-5.88548	5e-05	0.0123202	yes
Gpr68	Gpr68	Gpr68	chr12:100876681-100908198	WT.replicate-3.bam	SKO.replicate-1.bam	OK	18.03	34.3969	0.931877	3.84963	5e-05	0.0123202	yes
Gpx1	Gpx1	Gpx1	chr9:108339079-108340344	WT.replicate-3.bam	SKO.replicate-1.bam	OK	757.981	410.514	-0.88473	-6.20632	5e-05	0.0123202	yes
Gramd3	Gramd3	Gramd3	chr18:56432131-56503792	WT.replicate-3.bam	SKO.replicate-1.bam	OK	89.7545	167.256	0.898005	4.12476	5e-05	0.0123202	yes
H13	H13	H13	chr2:152669460-152708668	WT.replicate-3.bam	SKO.replicate-1.bam	OK	17.4899	6.42423	-1.44493	-5.19703	5e-05	0.0123202	yes
H2-Aa	H2-Aa	H2-Aa	chr17:34282750-34287771	WT.replicate-3.bam	SKO.replicate-1.bam	OK	7.21266	33.4403	2.21299	7.73415	5e-05	0.0123202	yes
H2-Q10	H2-Q10	H2-Q10	chr17:35470088-35474563	WT.replicate-3.bam	SKO.replicate-1.bam	OK	40.375	11.5892	-1.80068	-7.63778	5e-05	0.0123202	yes
H6pd	H6pd	H6pd	chr4:149979480-150009023	WT.replicate-3.bam	SKO.replicate-1.bam	OK	1.52011	4.3939	1.53133	4.94216	5e-05	0.0123202	yes
Herc3	Herc3	Herc3	chr6:58833699-58920396	WT.replicate-3.bam	SKO.replicate-1.bam	OK	3.12737	7.64656	1.28986	4.47608	5e-05	0.0123202	yes
Hmga1	Hmga1	Hmga1	chr17:27556573-27563672	WT.replicate-3.bam	SKO.replicate-1.bam	OK	238.984	39.2072	-2.60772	-8.29009	5e-05	0.0123202	yes
Hnrnpm	Hnrnpm	Hnrnpm	chr17:33646232-33685458	WT.replicate-3.bam	SKO.replicate-1.bam	OK	173.398	85.2403	-1.02448	-4.5464	5e-05	0.0123202	yes
Ifitm1	Ifitm1	Ifitm1	chr7:140967428-140969827	WT.replicate-3.bam	SKO.replicate-1.bam	OK	323.756	1433.76	2.14682	9.58672	5e-05	0.0123202	yes
Ifitm2	Ifitm2	Ifitm2	chr7:140954838-140955961	WT.replicate-3.bam	SKO.replicate-1.bam	OK	62.6419	310.01	2.30712	12.8813	5e-05	0.0123202	yes
Ifitm3	Ifitm3	Ifitm3	chr7:141009589-141010744	WT.replicate-3.bam	SKO.replicate-1.bam	OK	46.1765	160.629	1.7985	9.63489	5e-05	0.0123202	yes
Ifrd2	Ifrd2	Ifrd2	chr9:107587717-107593038	WT.replicate-3.bam	SKO.replicate-1.bam	OK	27.5686	10.6155	-1.37686	-6.03292	5e-05	0.0123202	yes
Igflr1	Igflr1	Igflr1	chr7:30565426-30567962	WT.replicate-3.bam	SKO.replicate-1.bam	OK	18.5926	47.2559	1.34576	5.92567	5e-05	0.0123202	yes
Il7r	Il7r	Il7r	chr15:9506158-9529876	WT.replicate-3.bam	SKO.replicate-1.bam	OK	5.65046	16.0152	1.503	4.74877	5e-05	0.0123202	yes
Isg20	Isg20	Isg20	chr7:78913764-78920396	WT.replicate-3.bam	SKO.replicate-1.bam	OK	21.0232	77.8197	1.88816	6.75681	5e-05	0.0123202	yes
Itgae	Itgae	Itgae	chr11:73090594-73147449	WT.replicate-3.bam	SKO.replicate-1.bam	OK	0.572725	10.0366	4.13128	6.74539	5e-05	0.0123202	yes
Itgb1	Itgb1	Itgb1	chr8:128685653-128733579	WT.replicate-3.bam	SKO.replicate-1.bam	OK	94.4773	176.569	0.902196	3.73319	5e-05	0.0123202	yes
Ldlrad4	Ldlrad4	Ldlrad4	chr18:67933256-68255549	WT.replicate-3.bam	SKO.replicate-1.bam	OK	0.656998	13.5583	4.36714	9.87886	5e-05	0.0123202	yes
Lpar5	Lpar5	Lpar5	chr6:125067919-125082472	WT.replicate-3.bam	SKO.replicate-1.bam	OK	20.4419	6.88552	-1.56989	-4.66575	5e-05	0.0123202	yes
Lrwd1	Lrwd1	Lrwd1	chr5:136123065-136136074	WT.replicate-3.bam	SKO.replicate-1.bam	OK	80.4268	33.2175	-1.27573	-6.4261	5e-05	0.0123202	yes
Mapk6	Mapk6	Mapk6	chr9:75386900-75410014	WT.replicate-3.bam	SKO.replicate-1.bam	OK	21.6707	10.7683	-1.00895	-4.03879	5e-05	0.0123202	yes
Mgst2	Mgst2	Mgst2	chr3:51661192-51682675	WT.replicate-3.bam	SKO.replicate-1.bam	OK	14.2412	57.3809	2.0105	8.59495	5e-05	0.0123202	yes
Mrps12	Mrps12	Mrps12	chr7:28739640-28741781	WT.replicate-3.bam	SKO.replicate-1.bam	OK	155.818	74.2339	-1.06971	-6.7924	5e-05	0.0123202	yes
Mthfd1	Mthfd1	Mthfd1	chr12:76255231-76319820	WT.replicate-3.bam	SKO.replicate-1.bam	OK	63.1315	28.4462	-1.15013	-5.29532	5e-05	0.0123202	yes
Myc	Myc	Myc	chr15:61985340-61990361	WT.replicate-3.bam	SKO.replicate-1.bam	OK	51.1193	11.9496	-2.09691	-7.97139	5e-05	0.0123202	yes
Ncf4	Ncf4	Ncf4	chr15:78244810-78262580	WT.replicate-3.bam	SKO.replicate-1.bam	OK	104.662	370.232	1.8227	9.79141	5e-05	0.0123202	yes
Ncln	Ncln	Ncln	chr10:81486458-81496363	WT.replicate-3.bam	SKO.replicate-1.bam	OK	23.9876	7.16946	-1.74235	-7.73567	5e-05	0.0123202	yes
Ndfip1	Ndfip1	Ndfip1	chr18:38418974-38464406	WT.replicate-3.bam	SKO.replicate-1.bam	OK	62.4057	22.3465	-1.48163	-6.68516	5e-05	0.0123202	yes
Necap2	Necap2	Necap2	chr4:141066511-141078345	WT.replicate-3.bam	SKO.replicate-1.bam	OK	89.57	41.0405	-1.12597	-5.48497	5e-05	0.0123202	yes
Nt5e	Nt5e	Nt5e	chr9:88327608-88372089	WT.replicate-3.bam	SKO.replicate-1.bam	OK	4.48901	17.3183	1.94783	6.56006	5e-05	0.0123202	yes
Pdia3	Pdia3	Pdia3	chr2:121413901-121438686	WT.replicate-3.bam	SKO.replicate-1.bam	OK	650.17	316.304	-1.0395	-4.31596	5e-05	0.0123202	yes
Pfkl	Pfkl	Pfkl	chr10:77986948-78009796	WT.replicate-3.bam	SKO.replicate-1.bam	OK	49.0451	21.1737	-1.21184	-5.8275	5e-05	0.0123202	yes
Pgls	Pgls	Pgls	chr8:71592183-71596267	WT.replicate-3.bam	SKO.replicate-1.bam	OK	60.325	15.2619	-1.98282	-10.2415	5e-05	0.0123202	yes
Pgrmc1	Pgrmc1	Pgrmc1	chrX:36598224-36606079	WT.replicate-3.bam	SKO.replicate-1.bam	OK	77.1988	34.0644	-1.18031	-4.93336	5e-05	0.0123202	yes
Pknox1	Pknox1	Pknox1	chr17:31564772-31607693	WT.replicate-3.bam	SKO.replicate-1.bam	OK	16.6442	8.44586	-0.978701	-3.8661	5e-05	0.0123202	yes
Plk1	Plk1	Plk1	chr7:122159436-122169875	WT.replicate-3.bam	SKO.replicate-1.bam	OK	250.584	88.3739	-1.5036	-8.11558	5e-05	0.0123202	yes
Pmepa1	Pmepa1	Pmepa1	chr2:173224464-173276533	WT.replicate-3.bam	SKO.replicate-1.bam	OK	0.373902	2.77742	2.89301	6.33238	5e-05	0.0123202	yes
Ppan	Ppan	Ppan	chr9:20888174-20892179	WT.replicate-3.bam	SKO.replicate-1.bam	OK	18.7204	5.74634	-1.7039	-6.73307	5e-05	0.0123202	yes
Rab1b	Rab1b	Rab1b	chr19:5099206-5106996	WT.replicate-3.bam	SKO.replicate-1.bam	OK	77.1454	36.0337	-1.09824	-5.53126	5e-05	0.0123202	yes
Rangap1	Rangap1	Rangap1	chr15:81704247-81729919	WT.replicate-3.bam	SKO.replicate-1.bam	OK	67.6248	36.4594	-0.891264	-3.89252	5e-05	0.0123202	yes
Rbm14	Rbm14	Rbm14	chr19:4800924-4811634	WT.replicate-3.bam	SKO.replicate-1.bam	OK	53.6577	23.2193	-1.20846	-6.29509	5e-05	0.0123202	yes
Rcc1	Rcc1	Rcc1	chr4:132331918-132345750	WT.replicate-3.bam	SKO.replicate-1.bam	OK	101.967	37.1155	-1.45801	-6.30453	5e-05	0.0123202	yes
Rps10	Rps10	Rps10	chr17:27630428-27635242	WT.replicate-3.bam	SKO.replicate-1.bam	OK	2283.71	1160.03	-0.977219	-7.54964	5e-05	0.0123202	yes
Ruvbl1	Ruvbl1	Ruvbl1	chr6:88465422-88497566	WT.replicate-3.bam	SKO.replicate-1.bam	OK	128.173	60.1684	-1.09102	-5.1844	5e-05	0.0123202	yes
Sell	Sell	Sell	chr1:164062075-164080785	WT.replicate-3.bam	SKO.replicate-1.bam	OK	34.7975	15.2068	-1.19427	-4.6814	5e-05	0.0123202	yes
Sema4a	Sema4a	Sema4a	chr3:88435961-88461182	WT.replicate-3.bam	SKO.replicate-1.bam	OK	35.0077	16.8108	-1.05829	-4.26908	5e-05	0.0123202	yes
Serinc3	Serinc3	Serinc3	chr2:163623272-163645800	WT.replicate-3.bam	SKO.replicate-1.bam	OK	21.5082	48.2046	1.16429	4.43444	5e-05	0.0123202	yes
Sh2d3c	Sh2d3c	Sh2d3c	chr2:32721054-32755007	WT.replicate-3.bam	SKO.replicate-1.bam	OK	30.9772	11.3662	-1.44646	-6.53643	5e-05	0.0123202	yes
Shmt2	Shmt2	Shmt2	chr10:127514938-127522444	WT.replicate-3.bam	SKO.replicate-1.bam	OK	182.055	92.4368	-0.977833	-4.35317	5e-05	0.0123202	yes
Ski	Ski	Ski	chr4:155154074-155222535	WT.replicate-3.bam	SKO.replicate-1.bam	OK	1.8134	5.44391	1.58594	5.60969	5e-05	0.0123202	yes
Skil	Skil	Skil	chr3:31095057-31122923	WT.replicate-3.bam	SKO.replicate-1.bam	OK	3.13361	15.2438	2.28232	8.84215	5e-05	0.0123202	yes
Slc40a1	Slc40a1	Slc40a1	chr1:45908069-45925594	WT.replicate-3.bam	SKO.replicate-1.bam	OK	3.26836	14.6768	2.16689	6.73552	5e-05	0.0123202	yes
Smurf2	Smurf2	Smurf2	chr11:106820063-106920715	WT.replicate-3.bam	SKO.replicate-1.bam	OK	2.13348	5.89587	1.4665	4.62466	5e-05	0.0123202	yes
Snrpa	Snrpa	Snrpa	chr7:27187005-27204320	WT.replicate-3.bam	SKO.replicate-1.bam	OK	116.902	55.4861	-1.07511	-5.77189	5e-05	0.0123202	yes
Snrpb	Snrpb	Snrpb	chr2:130171635-130179364	WT.replicate-3.bam	SKO.replicate-1.bam	OK	475.569	186.626	-1.34951	-7.77673	5e-05	0.0123202	yes
Spic	Spic	Spic	chr10:88675269-88683023	WT.replicate-3.bam	SKO.replicate-1.bam	OK	2.49828	9.56042	1.93614	4.76192	5e-05	0.0123202	yes
Srgn	Srgn	Srgn	chr10:62494427-62507755	WT.replicate-3.bam	SKO.replicate-1.bam	OK	462.401	848.173	0.875216	4.4737	5e-05	0.0123202	yes
Srrt	Srrt	Srrt	chr5:137295703-137307674	WT.replicate-3.bam	SKO.replicate-1.bam	OK	42.5705	18.083	-1.23522	-5.02179	5e-05	0.0123202	yes
Syncrip	Syncrip	Syncrip	chr9:88449737-88482397	WT.replicate-3.bam	SKO.replicate-1.bam	OK	49.8163	23.438	-1.08777	-4.25107	5e-05	0.0123202	yes
Tap2	Tap2	Tap2	chr17:34204478-34216321	WT.replicate-3.bam	SKO.replicate-1.bam	OK	167.789	60.3092	-1.4762	-8.11361	5e-05	0.0123202	yes
Tapbp	Tapbp	Tapbp	chr17:33919477-33929290	WT.replicate-3.bam	SKO.replicate-1.bam	OK	151.472	84.3603	-0.844411	-3.78493	5e-05	0.0123202	yes
Tars	Tars	Tars	chr15:11383662-11399658	WT.replicate-3.bam	SKO.replicate-1.bam	OK	91.759	48.0263	-0.934025	-4.3902	5e-05	0.0123202	yes
Tbrg4	Tbrg4	Tbrg4	chr11:6615597-6626067	WT.replicate-3.bam	SKO.replicate-1.bam	OK	48.2298	22.3134	-1.11201	-4.47728	5e-05	0.0123202	yes
Tex11	Tex11	Tex11	chrX:100838647-101059639	WT.replicate-3.bam	SKO.replicate-1.bam	OK	0	0.719931	inf	#NAME?	5e-05	0.0123202	yes
Trp53inp1	Trp53inp1	Trp53inp1	chr4:11156440-11174377	WT.replicate-3.bam	SKO.replicate-1.bam	OK	1.85249	4.67855	1.3366	4.386	5e-05	0.0123202	yes
Tssc4	Tssc4	Tssc4	chr7:143069367-143071087	WT.replicate-3.bam	SKO.replicate-1.bam	OK	68.3175	22.6849	-1.59052	-5.92713	5e-05	0.0123202	yes
Ube2s	Ube2s	Ube2s	chr7:4808013-4812340	WT.replicate-3.bam	SKO.replicate-1.bam	OK	114.705	55.7102	-1.04192	-5.48001	5e-05	0.0123202	yes
Vcam1	Vcam1	Vcam1	chr3:116110019-116129688	WT.replicate-3.bam	SKO.replicate-1.bam	OK	2.04037	9.42452	2.20759	6.23791	5e-05	0.0123202	yes
Wbp2	Wbp2	Wbp2	chr11:116078572-116086964	WT.replicate-3.bam	SKO.replicate-1.bam	OK	114.233	59.1193	-0.950276	-4.75893	5e-05	0.0123202	yes
Wdr4	Wdr4	Wdr4	chr17:31494321-31512487	WT.replicate-3.bam	SKO.replicate-1.bam	OK	14.278	5.60575	-1.34881	-5.30641	5e-05	0.0123202	yes
Xcl1	Xcl1	Xcl1	chr1:164931647-164935510	WT.replicate-3.bam	SKO.replicate-1.bam	OK	56.1659	170.447	1.60156	8.67833	5e-05	0.0123202	yes
Xrcc1	Xrcc1	Xrcc1	chr7:24547149-24573438	WT.replicate-3.bam	SKO.replicate-1.bam	OK	13.2978	5.18498	-1.35877	-5.06946	5e-05	0.0123202	yes
Ywhaq	Ywhaq	Ywhaq	chr12:21390328-21417436	WT.replicate-3.bam	SKO.replicate-1.bam	OK	320.791	171.656	-0.902115	-4.53356	5e-05	0.0123202	yes
Zfp1	Zfp1	Zfp1	chr8:111643442-111671011	WT.replicate-3.bam	SKO.replicate-1.bam	OK	3.11351	10.1589	1.70613	4.80492	5e-05	0.0123202	yes
Abi3	Abi3	Abi3	chr11:95824499-95845731	WT.replicate-1.bam	SKO.replicate-2.bam	OK	3.67717	11.1874	1.6052	5.48504	5e-05	0.0123202	yes
Actn1	Actn1	Actn1	chr12:80167541-80260371	WT.replicate-1.bam	SKO.replicate-2.bam	OK	18.9615	36.6974	0.952604	4.24367	5e-05	0.0123202	yes
Apol9b	Apol9b	Apol9b	chr15:77729071-77736382	WT.replicate-1.bam	SKO.replicate-2.bam	OK	0.626999	14.0065	4.48149	7.63029	5e-05	0.0123202	yes
As3mt	As3mt	As3mt	chr19:46707442-46741095	WT.replicate-1.bam	SKO.replicate-2.bam	OK	16.6066	6.44306	-1.36594	-4.74925	5e-05	0.0123202	yes
Car2	Car2	Car2	chr3:14886425-14900770	WT.replicate-1.bam	SKO.replicate-2.bam	OK	48.0822	106.603	1.14867	5.37049	5e-05	0.0123202	yes
Casp4	Casp4	Casp4	chr9:5308859-5336791	WT.replicate-1.bam	SKO.replicate-2.bam	OK	10.9714	3.3933	-1.69299	-4.42018	5e-05	0.0123202	yes
Ccl5	Ccl5	Ccl5	chr11:83525778-83530518	WT.replicate-1.bam	SKO.replicate-2.bam	OK	2881.26	590.744	-2.28609	-16.2864	5e-05	0.0123202	yes
Ccr2	Ccr2	Ccr2	chr9:124102182-124109140	WT.replicate-1.bam	SKO.replicate-2.bam	OK	20.8154	8.78736	-1.24415	-4.01208	5e-05	0.0123202	yes
Ccr5	Ccr5	Ccr5	chr9:124121542-124127183	WT.replicate-1.bam	SKO.replicate-2.bam	OK	21.8697	8.70618	-1.32882	-4.6096	5e-05	0.0123202	yes
Cd69	Cd69	Cd69	chr6:129267324-129275369	WT.replicate-1.bam	SKO.replicate-2.bam	OK	260.932	118.869	-1.1343	-4.73559	5e-05	0.0123202	yes
Clec12a	Clec12a	Clec12a	chr6:129350243-129365303	WT.replicate-1.bam	SKO.replicate-2.bam	OK	0.723275	4.46674	2.62661	4.88554	5e-05	0.0123202	yes
Coro2a	Coro2a	Coro2a	chr4:46536936-46601929	WT.replicate-1.bam	SKO.replicate-2.bam	OK	4.14714	11.6875	1.49478	5.21861	5e-05	0.0123202	yes
Ctla2a	Ctla2a	Ctla2a	chr13:60934154-60936625	WT.replicate-1.bam	SKO.replicate-2.bam	OK	127.552	64.7832	-0.977394	-4.16192	5e-05	0.0123202	yes
Ctse	Ctse	Ctse	chr1:131638313-131675507	WT.replicate-1.bam	SKO.replicate-2.bam	OK	156.456	80.0674	-0.966465	-4.42901	5e-05	0.0123202	yes
Fam26f	Fam26f	Fam26f	chr10:34126066-34127972	WT.replicate-1.bam	SKO.replicate-2.bam	OK	24.9503	8.44103	-1.56357	-6.46705	5e-05	0.0123202	yes
Gadd45b	Gadd45b	Gadd45b	chr10:80930090-80932204	WT.replicate-1.bam	SKO.replicate-2.bam	OK	43.7437	12.8414	-1.76827	-8.21292	5e-05	0.0123202	yes
Gbp6	Gbp6	Gbp6	chr5:105270701-105293699	WT.replicate-1.bam	SKO.replicate-2.bam	OK	10.1805	3.4653	-1.55476	-4.62219	5e-05	0.0123202	yes
Gimap7	Gimap7	Gimap7	chr6:48718620-48724636	WT.replicate-1.bam	SKO.replicate-2.bam	OK	127.975	40.9166	-1.6451	-7.14284	5e-05	0.0123202	yes
Gm14446	Gm14446	Gm14446	chr19:34592887-34601968	WT.replicate-1.bam	SKO.replicate-2.bam	OK	5.63709	1.51584	-1.89483	-4.83019	5e-05	0.0123202	yes
Gm8369	Gm8369	Gm8369	chr19:11492037-11512577	WT.replicate-1.bam	SKO.replicate-2.bam	OK	24.2623	10.0243	-1.27521	-3.91535	5e-05	0.0123202	yes
Gzmb	Gzmb	Gzmb	chr14:56258857-56262260	WT.replicate-1.bam	SKO.replicate-2.bam	OK	1841.31	787.374	-1.22561	-5.63411	5e-05	0.0123202	yes
Hist1h4d	Hist1h4d	Hist1h4d	chr13:23581601-23581913	WT.replicate-1.bam	SKO.replicate-2.bam	OK	2245.06	766.853	-1.54973	-23.6283	5e-05	0.0123202	yes
Ifi27l2a	Ifi27l2a	Ifi27l2a	chr12:103442166-103443680	WT.replicate-1.bam	SKO.replicate-2.bam	OK	1244.58	651.129	-0.934648	-6.83228	5e-05	0.0123202	yes
Ifitm1	Ifitm1	Ifitm1	chr7:140967428-140969827	WT.replicate-1.bam	SKO.replicate-2.bam	OK	314.332	1243.83	1.98443	8.86721	5e-05	0.0123202	yes
Ifitm2	Ifitm2	Ifitm2	chr7:140954838-140955961	WT.replicate-1.bam	SKO.replicate-2.bam	OK	68.1999	360.348	2.40155	13.6251	5e-05	0.0123202	yes
Igflr1	Igflr1	Igflr1	chr7:30565426-30567962	WT.replicate-1.bam	SKO.replicate-2.bam	OK	15.3824	38.1139	1.30904	5.58104	5e-05	0.0123202	yes
Il10ra	Il10ra	Il10ra	chr9:45253838-45269146	WT.replicate-1.bam	SKO.replicate-2.bam	OK	15.7384	6.36073	-1.30702	-4.79953	5e-05	0.0123202	yes
Il12rb2	Il12rb2	Il12rb2	chr6:67292017-67376137	WT.replicate-1.bam	SKO.replicate-2.bam	OK	9.19374	3.15851	-1.54141	-4.64819	5e-05	0.0123202	yes
Insl6	Insl6	Insl6	chr19:29321353-29325318	WT.replicate-1.bam	SKO.replicate-2.bam	OK	168.118	84.4053	-0.994066	-5.26349	5e-05	0.0123202	yes
Irf1	Irf1	Irf1	chr11:53770013-53778374	WT.replicate-1.bam	SKO.replicate-2.bam	OK	286.519	141.972	-1.01302	-4.60348	5e-05	0.0123202	yes
Isg20	Isg20	Isg20	chr7:78913764-78920396	WT.replicate-1.bam	SKO.replicate-2.bam	OK	21.0168	54.4724	1.37398	4.82884	5e-05	0.0123202	yes
Itgae	Itgae	Itgae	chr11:73090594-73147449	WT.replicate-1.bam	SKO.replicate-2.bam	OK	0.503906	9.43745	4.22717	6.63152	5e-05	0.0123202	yes
Klf6	Klf6	Klf6	chr13:5861488-5870393	WT.replicate-1.bam	SKO.replicate-2.bam	OK	66.572	34.7844	-0.936475	-3.71555	5e-05	0.0123202	yes
Klrd1	Klrd1	Klrd1	chr6:129591810-129598775	WT.replicate-1.bam	SKO.replicate-2.bam	OK	141.392	58.1916	-1.28081	-5.50053	5e-05	0.0123202	yes
Klrk1	Klrk1	Klrk1	chr6:129610320-129623841	WT.replicate-1.bam	SKO.replicate-2.bam	OK	62.306	23.5187	-1.40556	-6.12616	5e-05	0.0123202	yes
Ldlrad4	Ldlrad4	Ldlrad4	chr18:67933256-68255549	WT.replicate-1.bam	SKO.replicate-2.bam	OK	0.761463	11.1015	3.86584	9.03919	5e-05	0.0123202	yes
Ly6c2	Ly6c2	Ly6c2	chr15:75108160-75111949	WT.replicate-1.bam	SKO.replicate-2.bam	OK	1224.09	611.494	-1.0013	-5.49141	5e-05	0.0123202	yes
Ms4a4b	Ms4a4b	Ms4a4b	chr19:11443557-11463548	WT.replicate-1.bam	SKO.replicate-2.bam	OK	2253.41	1109.02	-1.02282	-4.22447	5e-05	0.0123202	yes
Ncf4	Ncf4	Ncf4	chr15:78244810-78262580	WT.replicate-1.bam	SKO.replicate-2.bam	OK	109.451	362.028	1.72582	9.39417	5e-05	0.0123202	yes
Nt5e	Nt5e	Nt5e	chr9:88327608-88372089	WT.replicate-1.bam	SKO.replicate-2.bam	OK	4.71207	13.4551	1.51372	5.04197	5e-05	0.0123202	yes
Pgrmc1	Pgrmc1	Pgrmc1	chrX:36598224-36606079	WT.replicate-1.bam	SKO.replicate-2.bam	OK	66.1048	35.1959	-0.909346	-3.74788	5e-05	0.0123202	yes
Phf11a	Phf11a	Phf11a	chr14:59276912-59297522	WT.replicate-1.bam	SKO.replicate-2.bam	OK	69.3007	26.9925	-1.36031	-5.1688	5e-05	0.0123202	yes
Pmepa1	Pmepa1	Pmepa1	chr2:173224464-173276533	WT.replicate-1.bam	SKO.replicate-2.bam	OK	0.352041	3.16897	3.1702	6.8743	5e-05	0.0123202	yes
Pnck	Pnck	Pnck	chrX:73655991-73660070	WT.replicate-1.bam	SKO.replicate-2.bam	OK	0	1.10359	inf	#NAME?	5e-05	0.0123202	yes
Pydc4	Pydc4	Pydc4	chr1:173591956-173599274	WT.replicate-1.bam	SKO.replicate-2.bam	OK	5.02657	1.69259	-1.57035	-4.39674	5e-05	0.0123202	yes
Pyhin1	Pyhin1	Pyhin1	chr1:173630858-173647928	WT.replicate-1.bam	SKO.replicate-2.bam	OK	16.6025	7.30695	-1.18406	-3.63437	5e-05	0.0123202	yes
Rn45s	Rn45s	Rn45s	chr17:39842996-39848829	WT.replicate-1.bam	SKO.replicate-2.bam	OK	626.193	227.442	-1.46111	-11.9594	5e-05	0.0123202	yes
Rps10	Rps10	Rps10	chr17:27630428-27635242	WT.replicate-1.bam	SKO.replicate-2.bam	OK	2018.25	1125.07	-0.843088	-6.55287	5e-05	0.0123202	yes
Sell	Sell	Sell	chr1:164062075-164080785	WT.replicate-1.bam	SKO.replicate-2.bam	OK	35.5751	11.1817	-1.66973	-6.38133	5e-05	0.0123202	yes
Serpinb6b	Serpinb6b	Serpinb6b	chr13:32965512-32979037	WT.replicate-1.bam	SKO.replicate-2.bam	OK	266.365	120.102	-1.14915	-4.75546	5e-05	0.0123202	yes
Serpinb9	Serpinb9	Serpinb9	chr13:33004540-33017955	WT.replicate-1.bam	SKO.replicate-2.bam	OK	107.151	47.0688	-1.1868	-4.44057	5e-05	0.0123202	yes
Serpinb9b	Serpinb9b	Serpinb9b	chr13:33027413-33040558	WT.replicate-1.bam	SKO.replicate-2.bam	OK	8.95947	2.04812	-2.12911	-5.26089	5e-05	0.0123202	yes
Sgk1	Sgk1	Sgk1	chr10:21882183-21999902	WT.replicate-1.bam	SKO.replicate-2.bam	OK	82.509	33.2245	-1.3123	-5.5865	5e-05	0.0123202	yes
Ski	Ski	Ski	chr4:155154074-155222535	WT.replicate-1.bam	SKO.replicate-2.bam	OK	1.78628	6.87623	1.94466	6.96306	5e-05	0.0123202	yes
Skil	Skil	Skil	chr3:31095057-31122923	WT.replicate-1.bam	SKO.replicate-2.bam	OK	4.11643	14.833	1.84935	7.32017	5e-05	0.0123202	yes
Smurf2	Smurf2	Smurf2	chr11:106820063-106920715	WT.replicate-1.bam	SKO.replicate-2.bam	OK	1.81706	5.59405	1.62229	4.92259	5e-05	0.0123202	yes
Tgtp1	Tgtp1	Tgtp1	chr11:48985328-48992246	WT.replicate-1.bam	SKO.replicate-2.bam	OK	9.45469	4.19651	-1.17184	-3.46865	5e-05	0.0123202	yes
Tubb6	Tubb6	Tubb6	chr18:67390730-67402749	WT.replicate-1.bam	SKO.replicate-2.bam	OK	3.05065	11.9079	1.96473	6.61436	5e-05	0.0123202	yes
Wdr95	Wdr95	Wdr95	chr5:149489055-149611894	WT.replicate-1.bam	SKO.replicate-2.bam	OK	7.51624	1.83413	-2.03491	-5.3202	5e-05	0.0123202	yes
Xcl1	Xcl1	Xcl1	chr1:164931647-164935510	WT.replicate-1.bam	SKO.replicate-2.bam	OK	44.4763	174.832	1.97486	10.4131	5e-05	0.0123202	yes
Xdh	Xdh	Xdh	chr17:73883907-73950182	WT.replicate-1.bam	SKO.replicate-2.bam	OK	7.67591	2.78572	-1.46229	-4.93413	5e-05	0.0123202	yes
Ahr	Ahr	Ahr	chr12:35497978-35534989	WT.replicate-2.bam	SKO.replicate-2.bam	OK	0.516114	1.85233	1.84358	4.0426	5e-05	0.0123202	yes
Apol9b	Apol9b	Apol9b	chr15:77729071-77736382	WT.replicate-2.bam	SKO.replicate-2.bam	OK	0.545506	14.0065	4.68235	7.55361	5e-05	0.0123202	yes
Car2	Car2	Car2	chr3:14886425-14900770	WT.replicate-2.bam	SKO.replicate-2.bam	OK	49.6288	106.603	1.103	5.14176	5e-05	0.0123202	yes
Ccl5	Ccl5	Ccl5	chr11:83525778-83530518	WT.replicate-2.bam	SKO.replicate-2.bam	OK	1686.38	590.744	-1.51332	-10.8861	5e-05	0.0123202	yes
Cd74	Cd74	Cd74	chr18:60803848-60812652	WT.replicate-2.bam	SKO.replicate-2.bam	OK	19.2274	46.7878	1.28297	4.60438	5e-05	0.0123202	yes
Clec12a	Clec12a	Clec12a	chr6:129350243-129365303	WT.replicate-2.bam	SKO.replicate-2.bam	OK	0.8289	4.46674	2.42995	4.59912	5e-05	0.0123202	yes
Gimap7	Gimap7	Gimap7	chr6:48718620-48724636	WT.replicate-2.bam	SKO.replicate-2.bam	OK	114.173	40.9166	-1.48046	-6.39936	5e-05	0.0123202	yes
Gpr68	Gpr68	Gpr68	chr12:100876681-100908198	WT.replicate-2.bam	SKO.replicate-2.bam	OK	15.0719	33.9384	1.17106	4.75454	5e-05	0.0123202	yes
Gzmb	Gzmb	Gzmb	chr14:56258857-56262260	WT.replicate-2.bam	SKO.replicate-2.bam	OK	1570.95	787.374	-0.996516	-4.6072	5e-05	0.0123202	yes
H2-Q10	H2-Q10	H2-Q10	chr17:35470088-35474563	WT.replicate-2.bam	SKO.replicate-2.bam	OK	41.1861	16.647	-1.3069	-5.92675	5e-05	0.0123202	yes
Hmga1	Hmga1	Hmga1	chr17:27556573-27563672	WT.replicate-2.bam	SKO.replicate-2.bam	OK	256.307	105.885	-1.27537	-4.47546	5e-05	0.0123202	yes
Ifitm1	Ifitm1	Ifitm1	chr7:140967428-140969827	WT.replicate-2.bam	SKO.replicate-2.bam	OK	460.642	1243.83	1.43307	6.4695	5e-05	0.0123202	yes
Ifitm2	Ifitm2	Ifitm2	chr7:140954838-140955961	WT.replicate-2.bam	SKO.replicate-2.bam	OK	86.6551	360.348	2.05604	11.9396	5e-05	0.0123202	yes
Igflr1	Igflr1	Igflr1	chr7:30565426-30567962	WT.replicate-2.bam	SKO.replicate-2.bam	OK	15.3561	38.1139	1.3115	5.61781	5e-05	0.0123202	yes
Isg20	Isg20	Isg20	chr7:78913764-78920396	WT.replicate-2.bam	SKO.replicate-2.bam	OK	22.6748	54.4724	1.26443	4.43431	5e-05	0.0123202	yes
Itgae	Itgae	Itgae	chr11:73090594-73147449	WT.replicate-2.bam	SKO.replicate-2.bam	OK	0.54309	9.43745	4.11913	6.50261	5e-05	0.0123202	yes
Klrk1	Klrk1	Klrk1	chr6:129610320-129623841	WT.replicate-2.bam	SKO.replicate-2.bam	OK	43.8802	23.5187	-0.89976	-3.88851	5e-05	0.0123202	yes
Ldlrad4	Ldlrad4	Ldlrad4	chr18:67933256-68255549	WT.replicate-2.bam	SKO.replicate-2.bam	OK	1.13989	11.1015	3.2838	8.57565	5e-05	0.0123202	yes
Ly6d	Ly6d	Ly6d	chr15:74762055-74763567	WT.replicate-2.bam	SKO.replicate-2.bam	OK	0	2.81874	inf	#NAME?	5e-05	0.0123202	yes
Myc	Myc	Myc	chr15:61985340-61990361	WT.replicate-2.bam	SKO.replicate-2.bam	OK	44.816	20.0771	-1.15846	-4.62579	5e-05	0.0123202	yes
Ncf4	Ncf4	Ncf4	chr15:78244810-78262580	WT.replicate-2.bam	SKO.replicate-2.bam	OK	109.069	362.028	1.73086	9.55487	5e-05	0.0123202	yes
Ndfip1	Ndfip1	Ndfip1	chr18:38418974-38464406	WT.replicate-2.bam	SKO.replicate-2.bam	OK	80.6485	26.6224	-1.59901	-7.33751	5e-05	0.0123202	yes
Nt5e	Nt5e	Nt5e	chr9:88327608-88372089	WT.replicate-2.bam	SKO.replicate-2.bam	OK	4.18327	13.4551	1.68545	5.4885	5e-05	0.0123202	yes
Pmepa1	Pmepa1	Pmepa1	chr2:173224464-173276533	WT.replicate-2.bam	SKO.replicate-2.bam	OK	0.539139	3.16897	2.55528	6.14755	5e-05	0.0123202	yes
Prpsap1	Prpsap1	Prpsap1	chr11:116470815-116490346	WT.replicate-2.bam	SKO.replicate-2.bam	OK	28.0721	12.416	-1.17694	-5.01522	5e-05	0.0123202	yes
Sell	Sell	Sell	chr1:164062075-164080785	WT.replicate-2.bam	SKO.replicate-2.bam	OK	26.5296	11.1817	-1.24646	-4.71983	5e-05	0.0123202	yes
Ski	Ski	Ski	chr4:155154074-155222535	WT.replicate-2.bam	SKO.replicate-2.bam	OK	2.83719	6.87623	1.27716	4.87655	5e-05	0.0123202	yes
Skil	Skil	Skil	chr3:31095057-31122923	WT.replicate-2.bam	SKO.replicate-2.bam	OK	3.95969	14.833	1.90535	7.53808	5e-05	0.0123202	yes
Slc40a1	Slc40a1	Slc40a1	chr1:45908069-45925594	WT.replicate-2.bam	SKO.replicate-2.bam	OK	4.64449	11.9952	1.36886	4.28285	5e-05	0.0123202	yes
Smad4	Smad4	Smad4	chr18:73639012-73703741	WT.replicate-2.bam	SKO.replicate-2.bam	OK	5.21308	1.81449	-1.52258	-4.36676	5e-05	0.0123202	yes
Smpd5	Smpd5	Smpd5	chr15:76294433-76307245	WT.replicate-2.bam	SKO.replicate-2.bam	OK	2.98642	9.936	1.73425	5.98366	5e-05	0.0123202	yes
Smurf2	Smurf2	Smurf2	chr11:106820063-106920715	WT.replicate-2.bam	SKO.replicate-2.bam	OK	2.26918	5.59405	1.30172	4.03232	5e-05	0.0123202	yes
Snrpb	Snrpb	Snrpb	chr2:130171635-130179364	WT.replicate-2.bam	SKO.replicate-2.bam	OK	489.702	283.223	-0.789964	-4.70355	5e-05	0.0123202	yes
Trf	Trf	Trf	chr9:103208875-103230286	WT.replicate-2.bam	SKO.replicate-2.bam	OK	2.0587	7.30702	1.82755	5.2159	5e-05	0.0123202	yes
Xcl1	Xcl1	Xcl1	chr1:164931647-164935510	WT.replicate-2.bam	SKO.replicate-2.bam	OK	58.6099	174.832	1.57676	8.62782	5e-05	0.0123202	yes
AI467606	AI467606	AI467606	chr7:127091435-127094049	WT.replicate-3.bam	SKO.replicate-2.bam	OK	55.8301	22.2622	-1.32645	-5.80272	5e-05	0.0123202	yes
As3mt	As3mt	As3mt	chr19:46707442-46741095	WT.replicate-3.bam	SKO.replicate-2.bam	OK	15.5924	6.44306	-1.27502	-4.41752	5e-05	0.0123202	yes
Btg1	Btg1	Btg1	chr10:96617000-96622811	WT.replicate-3.bam	SKO.replicate-2.bam	OK	15.6964	32.0179	1.02845	3.99975	5e-05	0.0123202	yes
Car2	Car2	Car2	chr3:14886425-14900770	WT.replicate-3.bam	SKO.replicate-2.bam	OK	49.4438	106.603	1.10839	5.18012	5e-05	0.0123202	yes
Ccl5	Ccl5	Ccl5	chr11:83525778-83530518	WT.replicate-3.bam	SKO.replicate-2.bam	OK	1931.31	590.744	-1.70897	-12.0896	5e-05	0.0123202	yes
Cd5l	Cd5l	Cd5l	chr3:87357880-87371074	WT.replicate-3.bam	SKO.replicate-2.bam	OK	1.55532	5.10072	1.71348	4.21777	5e-05	0.0123202	yes
Cd69	Cd69	Cd69	chr6:129267324-129275369	WT.replicate-3.bam	SKO.replicate-2.bam	OK	221.968	118.869	-0.900973	-3.78103	5e-05	0.0123202	yes
Cd74	Cd74	Cd74	chr18:60803848-60812652	WT.replicate-3.bam	SKO.replicate-2.bam	OK	18.65	46.7878	1.32695	4.78343	5e-05	0.0123202	yes
Cdh1	Cdh1	Cdh1	chr8:106603367-106670246	WT.replicate-3.bam	SKO.replicate-2.bam	OK	0	0.704154	inf	#NAME?	5e-05	0.0123202	yes
Cish	Cish	Cish	chr9:107296688-107301961	WT.replicate-3.bam	SKO.replicate-2.bam	OK	14.3134	34.6354	1.27488	5.77112	5e-05	0.0123202	yes
Clec12a	Clec12a	Clec12a	chr6:129350243-129365303	WT.replicate-3.bam	SKO.replicate-2.bam	OK	0.508505	4.46674	3.13489	5.32742	5e-05	0.0123202	yes
Coro2a	Coro2a	Coro2a	chr4:46536936-46601929	WT.replicate-3.bam	SKO.replicate-2.bam	OK	3.85025	11.6875	1.60195	5.53811	5e-05	0.0123202	yes
Fos	Fos	Fos	chr12:85473900-85477270	WT.replicate-3.bam	SKO.replicate-2.bam	OK	52.9028	25.3649	-1.06051	-4.80338	5e-05	0.0123202	yes
Gimap7	Gimap7	Gimap7	chr6:48718620-48724636	WT.replicate-3.bam	SKO.replicate-2.bam	OK	126.999	40.9166	-1.63406	-7.09916	5e-05	0.0123202	yes
Gzmb	Gzmb	Gzmb	chr14:56258857-56262260	WT.replicate-3.bam	SKO.replicate-2.bam	OK	1569.83	787.374	-0.995487	-4.59428	5e-05	0.0123202	yes
H2-Q10	H2-Q10	H2-Q10	chr17:35470088-35474563	WT.replicate-3.bam	SKO.replicate-2.bam	OK	40.375	16.647	-1.2782	-5.6999	5e-05	0.0123202	yes
H6pd	H6pd	H6pd	chr4:149979480-150009023	WT.replicate-3.bam	SKO.replicate-2.bam	OK	1.52011	4.48614	1.5613	5.04772	5e-05	0.0123202	yes
Hist1h4d	Hist1h4d	Hist1h4d	chr13:23581601-23581913	WT.replicate-3.bam	SKO.replicate-2.bam	OK	2026.6	766.853	-1.40204	-20.9864	5e-05	0.0123202	yes
Hmga1	Hmga1	Hmga1	chr17:27556573-27563672	WT.replicate-3.bam	SKO.replicate-2.bam	OK	238.984	105.885	-1.17441	-4.1016	5e-05	0.0123202	yes
Ifitm1	Ifitm1	Ifitm1	chr7:140967428-140969827	WT.replicate-3.bam	SKO.replicate-2.bam	OK	323.756	1243.83	1.94181	8.69727	5e-05	0.0123202	yes
Ifitm2	Ifitm2	Ifitm2	chr7:140954838-140955961	WT.replicate-3.bam	SKO.replicate-2.bam	OK	62.6419	360.348	2.52419	14.0633	5e-05	0.0123202	yes
Ifitm3	Ifitm3	Ifitm3	chr7:141009589-141010744	WT.replicate-3.bam	SKO.replicate-2.bam	OK	46.1765	130.719	1.50124	7.93056	5e-05	0.0123202	yes
Isg20	Isg20	Isg20	chr7:78913764-78920396	WT.replicate-3.bam	SKO.replicate-2.bam	OK	21.0232	54.4724	1.37355	4.83945	5e-05	0.0123202	yes
Itgae	Itgae	Itgae	chr11:73090594-73147449	WT.replicate-3.bam	SKO.replicate-2.bam	OK	0.572725	9.43745	4.04248	6.5735	5e-05	0.0123202	yes
Klf6	Klf6	Klf6	chr13:5861488-5870393	WT.replicate-3.bam	SKO.replicate-2.bam	OK	70.6653	34.7844	-1.02256	-4.09166	5e-05	0.0123202	yes
Klrk1	Klrk1	Klrk1	chr6:129610320-129623841	WT.replicate-3.bam	SKO.replicate-2.bam	OK	51.5402	23.5187	-1.13189	-4.89579	5e-05	0.0123202	yes
Ldlrad4	Ldlrad4	Ldlrad4	chr18:67933256-68255549	WT.replicate-3.bam	SKO.replicate-2.bam	OK	0.656998	11.1015	4.07873	9.17534	5e-05	0.0123202	yes
Mt3	Mt3	Mt3	chr8:94152606-94154148	WT.replicate-3.bam	SKO.replicate-2.bam	OK	96.6993	40.3301	-1.26165	-7.26777	5e-05	0.0123202	yes
Myc	Myc	Myc	chr15:61985340-61990361	WT.replicate-3.bam	SKO.replicate-2.bam	OK	51.1193	20.0771	-1.34832	-5.44257	5e-05	0.0123202	yes
Ncf4	Ncf4	Ncf4	chr15:78244810-78262580	WT.replicate-3.bam	SKO.replicate-2.bam	OK	104.662	362.028	1.79037	9.65555	5e-05	0.0123202	yes
Ndfip1	Ndfip1	Ndfip1	chr18:38418974-38464406	WT.replicate-3.bam	SKO.replicate-2.bam	OK	62.4057	26.6224	-1.22904	-5.60161	5e-05	0.0123202	yes
Nt5e	Nt5e	Nt5e	chr9:88327608-88372089	WT.replicate-3.bam	SKO.replicate-2.bam	OK	4.48901	13.4551	1.58368	5.24878	5e-05	0.0123202	yes
Pgrmc1	Pgrmc1	Pgrmc1	chrX:36598224-36606079	WT.replicate-3.bam	SKO.replicate-2.bam	OK	77.1988	35.1959	-1.13317	-4.71364	5e-05	0.0123202	yes
Phf11a	Phf11a	Phf11a	chr14:59276912-59297522	WT.replicate-3.bam	SKO.replicate-2.bam	OK	58.2865	26.9925	-1.11061	-4.17453	5e-05	0.0123202	yes
Pmepa1	Pmepa1	Pmepa1	chr2:173224464-173276533	WT.replicate-3.bam	SKO.replicate-2.bam	OK	0.373902	3.16897	3.08328	6.78671	5e-05	0.0123202	yes
Ppp1r16b	Ppp1r16b	Ppp1r16b	chr2:158666732-158766334	WT.replicate-3.bam	SKO.replicate-2.bam	OK	7.48781	17.319	1.20974	4.95803	5e-05	0.0123202	yes
Rps10	Rps10	Rps10	chr17:27630428-27635242	WT.replicate-3.bam	SKO.replicate-2.bam	OK	2283.71	1125.07	-1.02136	-7.85106	5e-05	0.0123202	yes
Sbk1	Sbk1	Sbk1	chr7:126272618-126294999	WT.replicate-3.bam	SKO.replicate-2.bam	OK	3.78882	9.26732	1.29041	5.30964	5e-05	0.0123202	yes
Sell	Sell	Sell	chr1:164062075-164080785	WT.replicate-3.bam	SKO.replicate-2.bam	OK	34.7975	11.1817	-1.63784	-6.24679	5e-05	0.0123202	yes
Ski	Ski	Ski	chr4:155154074-155222535	WT.replicate-3.bam	SKO.replicate-2.bam	OK	1.8134	6.87623	1.92292	6.88443	5e-05	0.0123202	yes
Skil	Skil	Skil	chr3:31095057-31122923	WT.replicate-3.bam	SKO.replicate-2.bam	OK	3.13361	14.833	2.24292	8.64508	5e-05	0.0123202	yes
Slc40a1	Slc40a1	Slc40a1	chr1:45908069-45925594	WT.replicate-3.bam	SKO.replicate-2.bam	OK	3.26836	11.9952	1.87581	5.74143	5e-05	0.0123202	yes
Smurf2	Smurf2	Smurf2	chr11:106820063-106920715	WT.replicate-3.bam	SKO.replicate-2.bam	OK	2.13348	5.59405	1.39069	4.34626	5e-05	0.0123202	yes
Vcam1	Vcam1	Vcam1	chr3:116110019-116129688	WT.replicate-3.bam	SKO.replicate-2.bam	OK	2.04037	6.04093	1.56594	4.28795	5e-05	0.0123202	yes
Xcl1	Xcl1	Xcl1	chr1:164931647-164935510	WT.replicate-3.bam	SKO.replicate-2.bam	OK	56.1659	174.832	1.6382	8.83478	5e-05	0.0123202	yes
Ccl5	Ccl5	Ccl5	chr11:83525778-83530518	SKO.replicate-1.bam	SKO.replicate-2.bam	OK	1145.4	590.744	-0.955242	-6.83525	5e-05	0.0123202	yes
Cd69	Cd69	Cd69	chr6:129267324-129275369	SKO.replicate-1.bam	SKO.replicate-2.bam	OK	220.721	118.869	-0.892849	-3.72006	5e-05	0.0123202	yes
Gbp6	Gbp6	Gbp6	chr5:105270701-105293699	SKO.replicate-1.bam	SKO.replicate-2.bam	OK	8.93185	3.4653	-1.36598	-4.03638	5e-05	0.0123202	yes
Gzma	Gzma	Gzma	chr13:113093826-113100981	SKO.replicate-1.bam	SKO.replicate-2.bam	OK	2164.6	1202.09	-0.848553	-4.17911	5e-05	0.0123202	yes
Hist1h4d	Hist1h4d	Hist1h4d	chr13:23581601-23581913	SKO.replicate-1.bam	SKO.replicate-2.bam	OK	1905.1	766.853	-1.31284	-20.1187	5e-05	0.0123202	yes
Hmga1	Hmga1	Hmga1	chr17:27556573-27563672	SKO.replicate-1.bam	SKO.replicate-2.bam	OK	39.2072	105.885	1.43331	4.58318	5e-05	0.0123202	yes
Ifi27l2a	Ifi27l2a	Ifi27l2a	chr12:103442166-103443680	SKO.replicate-1.bam	SKO.replicate-2.bam	OK	1342.49	651.129	-1.0439	-7.6703	5e-05	0.0123202	yes
Ifit3	Ifit3	Ifit3	chr19:34583528-34588982	SKO.replicate-1.bam	SKO.replicate-2.bam	OK	13.5066	4.60687	-1.5518	-4.71953	5e-05	0.0123202	yes
Irf1	Irf1	Irf1	chr11:53770013-53778374	SKO.replicate-1.bam	SKO.replicate-2.bam	OK	278.058	141.972	-0.969775	-4.40767	5e-05	0.0123202	yes
Ly6c2	Ly6c2	Ly6c2	chr15:75108160-75111949	SKO.replicate-1.bam	SKO.replicate-2.bam	OK	1105.3	611.494	-0.854034	-4.69347	5e-05	0.0123202	yes
Pgls	Pgls	Pgls	chr8:71592183-71596267	SKO.replicate-1.bam	SKO.replicate-2.bam	OK	15.2619	44.8381	1.55479	7.97113	5e-05	0.0123202	yes
Pold1	Pold1	Pold1	chr7:44532743-44548815	SKO.replicate-1.bam	SKO.replicate-2.bam	OK	20.4125	42.6473	1.063	5.72286	5e-05	0.0123202	yes
Rtp4	Rtp4	Rtp4	chr16:23609918-23614222	SKO.replicate-1.bam	SKO.replicate-2.bam	OK	56.8296	23.3011	-1.28624	-5.00637	5e-05	0.0123202	yes
Tsc22d3	Tsc22d3	Tsc22d3	chrX:140539528-140600522	SKO.replicate-1.bam	SKO.replicate-2.bam	OK	167.711	92.8798	-0.852538	-3.78081	5e-05	0.0123202	yes
Usp18	Usp18	Usp18	chr6:121245905-121270917	SKO.replicate-1.bam	SKO.replicate-2.bam	OK	22.6064	9.9539	-1.1834	-4.3935	5e-05	0.0123202	yes
Abi3	Abi3	Abi3	chr11:95824499-95845731	WT.replicate-1.bam	SKO.replicate-3.bam	OK	3.67717	10.8073	1.55534	5.26998	5e-05	0.0123202	yes
Actb	Actb	Actb	chr5:142903115-142906724	WT.replicate-1.bam	SKO.replicate-3.bam	OK	13849.2	14433.3	0.0596027	21.5393	5e-05	0.0123202	yes
Apol9b	Apol9b	Apol9b	chr15:77729071-77736382	WT.replicate-1.bam	SKO.replicate-3.bam	OK	0.626999	14.6983	4.55105	7.75788	5e-05	0.0123202	yes
Car2	Car2	Car2	chr3:14886425-14900770	WT.replicate-1.bam	SKO.replicate-3.bam	OK	48.0822	109.204	1.18346	5.57011	5e-05	0.0123202	yes
Ccl5	Ccl5	Ccl5	chr11:83525778-83530518	WT.replicate-1.bam	SKO.replicate-3.bam	OK	2881.26	757.562	-1.92726	-14.2648	5e-05	0.0123202	yes
Ccr2	Ccr2	Ccr2	chr9:124102182-124109140	WT.replicate-1.bam	SKO.replicate-3.bam	OK	20.8154	9.8752	-1.07577	-3.47425	5e-05	0.0123202	yes
Ccr5	Ccr5	Ccr5	chr9:124121542-124127183	WT.replicate-1.bam	SKO.replicate-3.bam	OK	21.8697	9.74534	-1.16615	-4.07058	5e-05	0.0123202	yes
Cd74	Cd74	Cd74	chr18:60803848-60812652	WT.replicate-1.bam	SKO.replicate-3.bam	OK	26.8145	59.4429	1.14849	4.3377	5e-05	0.0123202	yes
Clec12a	Clec12a	Clec12a	chr6:129350243-129365303	WT.replicate-1.bam	SKO.replicate-3.bam	OK	0.723275	4.29327	2.56946	4.7576	5e-05	0.0123202	yes
Gadd45b	Gadd45b	Gadd45b	chr10:80930090-80932204	WT.replicate-1.bam	SKO.replicate-3.bam	OK	43.7437	16.7251	-1.38706	-6.71228	5e-05	0.0123202	yes
Gimap7	Gimap7	Gimap7	chr6:48718620-48724636	WT.replicate-1.bam	SKO.replicate-3.bam	OK	127.975	48.344	-1.40445	-6.14763	5e-05	0.0123202	yes
Gpr68	Gpr68	Gpr68	chr12:100876681-100908198	WT.replicate-1.bam	SKO.replicate-3.bam	OK	17.2292	39.4022	1.19342	4.90178	5e-05	0.0123202	yes
Gzmb	Gzmb	Gzmb	chr14:56258857-56262260	WT.replicate-1.bam	SKO.replicate-3.bam	OK	1841.31	863.146	-1.09305	-5.02387	5e-05	0.0123202	yes
H2-Q10	H2-Q10	H2-Q10	chr17:35470088-35474563	WT.replicate-1.bam	SKO.replicate-3.bam	OK	36.0059	14.0699	-1.35562	-5.95555	5e-05	0.0123202	yes
Id3	Id3	Id3	chr4:136143821-136145392	WT.replicate-1.bam	SKO.replicate-3.bam	OK	51.1137	126.095	1.30273	7.97982	5e-05	0.0123202	yes
Ifitm1	Ifitm1	Ifitm1	chr7:140967428-140969827	WT.replicate-1.bam	SKO.replicate-3.bam	OK	314.332	1114.34	1.82583	8.14886	5e-05	0.0123202	yes
Ifitm2	Ifitm2	Ifitm2	chr7:140954838-140955961	WT.replicate-1.bam	SKO.replicate-3.bam	OK	68.1999	268.875	1.9791	11.3243	5e-05	0.0123202	yes
Igflr1	Igflr1	Igflr1	chr7:30565426-30567962	WT.replicate-1.bam	SKO.replicate-3.bam	OK	15.3824	44.9961	1.54852	6.7305	5e-05	0.0123202	yes
Il12rb2	Il12rb2	Il12rb2	chr6:67292017-67376137	WT.replicate-1.bam	SKO.replicate-3.bam	OK	9.19374	2.36891	-1.95643	-5.62245	5e-05	0.0123202	yes
Isg20	Isg20	Isg20	chr7:78913764-78920396	WT.replicate-1.bam	SKO.replicate-3.bam	OK	21.0168	62.2162	1.56575	5.53911	5e-05	0.0123202	yes
Itgae	Itgae	Itgae	chr11:73090594-73147449	WT.replicate-1.bam	SKO.replicate-3.bam	OK	0.503906	9.97257	4.30674	6.77254	5e-05	0.0123202	yes
Klk1b11	Klk1b11	Klk1b11	chr7:43995878-43999875	WT.replicate-1.bam	SKO.replicate-3.bam	OK	0.860251	0	#NAME?	#NAME?	5e-05	0.0123202	yes
Klrk1	Klrk1	Klrk1	chr6:129610320-129623841	WT.replicate-1.bam	SKO.replicate-3.bam	OK	62.306	26.918	-1.2108	-5.33991	5e-05	0.0123202	yes
Ldlrad4	Ldlrad4	Ldlrad4	chr18:67933256-68255549	WT.replicate-1.bam	SKO.replicate-3.bam	OK	0.761463	13.2366	4.11962	9.69798	5e-05	0.0123202	yes
Mgst2	Mgst2	Mgst2	chr3:51661192-51682675	WT.replicate-1.bam	SKO.replicate-3.bam	OK	15.3647	53.8464	1.80923	7.85056	5e-05	0.0123202	yes
Ncf4	Ncf4	Ncf4	chr15:78244810-78262580	WT.replicate-1.bam	SKO.replicate-3.bam	OK	109.451	329.047	1.58801	8.70116	5e-05	0.0123202	yes
Nfkbiz	Nfkbiz	Nfkbiz	chr16:55811376-55838641	WT.replicate-1.bam	SKO.replicate-3.bam	OK	21.1023	9.92397	-1.08841	-4.23991	5e-05	0.0123202	yes
Nt5e	Nt5e	Nt5e	chr9:88327608-88372089	WT.replicate-1.bam	SKO.replicate-3.bam	OK	4.71207	17.5055	1.89337	6.39301	5e-05	0.0123202	yes
Pde2a	Pde2a	Pde2a	chr7:101421690-101512829	WT.replicate-1.bam	SKO.replicate-3.bam	OK	4.68066	1.72961	-1.43627	-4.13167	5e-05	0.0123202	yes
Pmepa1	Pmepa1	Pmepa1	chr2:173224464-173276533	WT.replicate-1.bam	SKO.replicate-3.bam	OK	0.352041	2.73439	2.9574	6.36802	5e-05	0.0123202	yes
Sec1	Sec1	Sec1	chr7:45677685-45694554	WT.replicate-1.bam	SKO.replicate-3.bam	OK	0	0.867253	inf	#NAME?	5e-05	0.0123202	yes
Sell	Sell	Sell	chr1:164062075-164080785	WT.replicate-1.bam	SKO.replicate-3.bam	OK	35.5751	13.8205	-1.36406	-5.32886	5e-05	0.0123202	yes
Serpinb6b	Serpinb6b	Serpinb6b	chr13:32965512-32979037	WT.replicate-1.bam	SKO.replicate-3.bam	OK	266.365	135.893	-0.970933	-4.0171	5e-05	0.0123202	yes
Serpinb9	Serpinb9	Serpinb9	chr13:33004540-33017955	WT.replicate-1.bam	SKO.replicate-3.bam	OK	107.151	46.6757	-1.1989	-4.4584	5e-05	0.0123202	yes
Serpinb9b	Serpinb9b	Serpinb9b	chr13:33027413-33040558	WT.replicate-1.bam	SKO.replicate-3.bam	OK	8.95947	1.6298	-2.45872	-5.78278	5e-05	0.0123202	yes
Sgk1	Sgk1	Sgk1	chr10:21882183-21999902	WT.replicate-1.bam	SKO.replicate-3.bam	OK	82.509	43.4437	-0.925407	-4.0252	5e-05	0.0123202	yes
Ski	Ski	Ski	chr4:155154074-155222535	WT.replicate-1.bam	SKO.replicate-3.bam	OK	1.78628	4.82509	1.4336	5.03712	5e-05	0.0123202	yes
Skil	Skil	Skil	chr3:31095057-31122923	WT.replicate-1.bam	SKO.replicate-3.bam	OK	4.11643	12.9442	1.65283	6.53241	5e-05	0.0123202	yes
Smpd5	Smpd5	Smpd5	chr15:76294433-76307245	WT.replicate-1.bam	SKO.replicate-3.bam	OK	3.64445	11.9945	1.7186	6.27682	5e-05	0.0123202	yes
Smurf2	Smurf2	Smurf2	chr11:106820063-106920715	WT.replicate-1.bam	SKO.replicate-3.bam	OK	1.81706	4.40905	1.27886	3.81781	5e-05	0.0123202	yes
Tex11	Tex11	Tex11	chrX:100838647-101059639	WT.replicate-1.bam	SKO.replicate-3.bam	OK	0	0.76158	inf	#NAME?	5e-05	0.0123202	yes
Tnfrsf13c	Tnfrsf13c	Tnfrsf13c	chr15:82221743-82224336	WT.replicate-1.bam	SKO.replicate-3.bam	OK	14.0939	32.8194	1.21948	4.92128	5e-05	0.0123202	yes
Tsc22d1	Tsc22d1	Tsc22d1	chr14:76415820-76507766	WT.replicate-1.bam	SKO.replicate-3.bam	OK	2.75236	9.51354	1.78931	4.62727	5e-05	0.0123202	yes
Vps37b	Vps37b	Vps37b	chr5:124004640-124032260	WT.replicate-1.bam	SKO.replicate-3.bam	OK	23.8321	10.7237	-1.1521	-5.14902	5e-05	0.0123202	yes
Wdr95	Wdr95	Wdr95	chr5:149489055-149611894	WT.replicate-1.bam	SKO.replicate-3.bam	OK	7.51624	2.22109	-1.75874	-4.75967	5e-05	0.0123202	yes
Xcl1	Xcl1	Xcl1	chr1:164931647-164935510	WT.replicate-1.bam	SKO.replicate-3.bam	OK	44.4763	186.574	2.06864	11.0806	5e-05	0.0123202	yes
2210016F16Rik	2210016F16Rik	2210016F16Rik	chr13:58380045-58385225	WT.replicate-2.bam	SKO.replicate-3.bam	OK	10.5195	3.8334	-1.45637	-4.97711	5e-05	0.0123202	yes
Ap3m2	Ap3m2	Ap3m2	chr8:22787353-22805654	WT.replicate-2.bam	SKO.replicate-3.bam	OK	2.97389	7.30668	1.29687	4.01815	5e-05	0.0123202	yes
Apol9b	Apol9b	Apol9b	chr15:77729071-77736382	WT.replicate-2.bam	SKO.replicate-3.bam	OK	0.545506	14.6983	4.75192	7.67396	5e-05	0.0123202	yes
Car2	Car2	Car2	chr3:14886425-14900770	WT.replicate-2.bam	SKO.replicate-3.bam	OK	49.6288	109.204	1.13778	5.33916	5e-05	0.0123202	yes
Ccl5	Ccl5	Ccl5	chr11:83525778-83530518	WT.replicate-2.bam	SKO.replicate-3.bam	OK	1686.38	757.562	-1.15449	-8.63498	5e-05	0.0123202	yes
Cd7	Cd7	Cd7	chr11:121036748-121039478	WT.replicate-2.bam	SKO.replicate-3.bam	OK	73.5105	172.71	1.23233	6.1985	5e-05	0.0123202	yes
Cd74	Cd74	Cd74	chr18:60803848-60812652	WT.replicate-2.bam	SKO.replicate-3.bam	OK	19.2274	59.4429	1.62834	5.91334	5e-05	0.0123202	yes
Clec12a	Clec12a	Clec12a	chr6:129350243-129365303	WT.replicate-2.bam	SKO.replicate-3.bam	OK	0.8289	4.29327	2.3728	4.4699	5e-05	0.0123202	yes
Ddx54	Ddx54	Ddx54	chr5:120613129-120634235	WT.replicate-2.bam	SKO.replicate-3.bam	OK	12.4107	5.49721	-1.17481	-4.13906	5e-05	0.0123202	yes
Dusp4	Dusp4	Dusp4	chr8:34807609-34819894	WT.replicate-2.bam	SKO.replicate-3.bam	OK	5.40312	1.5598	-1.79243	-5.29276	5e-05	0.0123202	yes
Fasn	Fasn	Fasn	chr11:120805957-120824547	WT.replicate-2.bam	SKO.replicate-3.bam	OK	7.34062	3.59355	-1.03049	-4.52126	5e-05	0.0123202	yes
Gimap7	Gimap7	Gimap7	chr6:48718620-48724636	WT.replicate-2.bam	SKO.replicate-3.bam	OK	114.173	48.344	-1.23981	-5.40238	5e-05	0.0123202	yes
Gpr68	Gpr68	Gpr68	chr12:100876681-100908198	WT.replicate-2.bam	SKO.replicate-3.bam	OK	15.0719	39.4022	1.38642	5.65613	5e-05	0.0123202	yes
Gzmk	Gzmk	Gzmk	chr13:113171873-113180897	WT.replicate-2.bam	SKO.replicate-3.bam	OK	240.807	499.506	1.05262	5.87524	5e-05	0.0123202	yes
H2-Aa	H2-Aa	H2-Aa	chr17:34282750-34287771	WT.replicate-2.bam	SKO.replicate-3.bam	OK	6.99092	28.2088	2.01259	6.97784	5e-05	0.0123202	yes
H2-Q10	H2-Q10	H2-Q10	chr17:35470088-35474563	WT.replicate-2.bam	SKO.replicate-3.bam	OK	41.1861	14.0699	-1.54955	-6.93483	5e-05	0.0123202	yes
Hmga1	Hmga1	Hmga1	chr17:27556573-27563672	WT.replicate-2.bam	SKO.replicate-3.bam	OK	256.307	99.1058	-1.37083	-4.73598	5e-05	0.0123202	yes
Ifi27l2a	Ifi27l2a	Ifi27l2a	chr12:103442166-103443680	WT.replicate-2.bam	SKO.replicate-3.bam	OK	598.043	1223	1.0321	7.79338	5e-05	0.0123202	yes
Ifitm1	Ifitm1	Ifitm1	chr7:140967428-140969827	WT.replicate-2.bam	SKO.replicate-3.bam	OK	460.642	1114.34	1.27447	5.74656	5e-05	0.0123202	yes
Ifitm2	Ifitm2	Ifitm2	chr7:140954838-140955961	WT.replicate-2.bam	SKO.replicate-3.bam	OK	86.6551	268.875	1.63358	9.57139	5e-05	0.0123202	yes
Igflr1	Igflr1	Igflr1	chr7:30565426-30567962	WT.replicate-2.bam	SKO.replicate-3.bam	OK	15.3561	44.9961	1.55099	6.77412	5e-05	0.0123202	yes
Igj	Igj	Igj	chr5:88519808-88527897	WT.replicate-2.bam	SKO.replicate-3.bam	OK	0	0.571615	inf	#NAME?	5e-05	0.0123202	yes
Il7r	Il7r	Il7r	chr15:9506158-9529876	WT.replicate-2.bam	SKO.replicate-3.bam	OK	5.39405	13.1597	1.28668	3.86765	5e-05	0.0123202	yes
Isg20	Isg20	Isg20	chr7:78913764-78920396	WT.replicate-2.bam	SKO.replicate-3.bam	OK	22.6748	62.2162	1.4562	5.14038	5e-05	0.0123202	yes
Itgae	Itgae	Itgae	chr11:73090594-73147449	WT.replicate-2.bam	SKO.replicate-3.bam	OK	0.54309	9.97257	4.1987	6.6443	5e-05	0.0123202	yes
Klhl6	Klhl6	Klhl6	chr16:19946491-19983049	WT.replicate-2.bam	SKO.replicate-3.bam	OK	84.269	159.541	0.920856	4.03347	5e-05	0.0123202	yes
Klk1b11	Klk1b11	Klk1b11	chr7:43995878-43999875	WT.replicate-2.bam	SKO.replicate-3.bam	OK	1.1383	0	#NAME?	#NAME?	5e-05	0.0123202	yes
Ldlrad4	Ldlrad4	Ldlrad4	chr18:67933256-68255549	WT.replicate-2.bam	SKO.replicate-3.bam	OK	1.13989	13.2366	3.53757	9.31683	5e-05	0.0123202	yes
Ly6d	Ly6d	Ly6d	chr15:74762055-74763567	WT.replicate-2.bam	SKO.replicate-3.bam	OK	0	6.76982	inf	#NAME?	5e-05	0.0123202	yes
Malat1	Malat1	Malat1	chr19:5795689-5802671	WT.replicate-2.bam	SKO.replicate-3.bam	OK	82.1428	171.915	1.06549	4.0695	5e-05	0.0123202	yes
Mgst2	Mgst2	Mgst2	chr3:51661192-51682675	WT.replicate-2.bam	SKO.replicate-3.bam	OK	11.0081	53.8464	2.29029	9.26552	5e-05	0.0123202	yes
Ncf4	Ncf4	Ncf4	chr15:78244810-78262580	WT.replicate-2.bam	SKO.replicate-3.bam	OK	109.069	329.047	1.59306	8.85392	5e-05	0.0123202	yes
Ndfip1	Ndfip1	Ndfip1	chr18:38418974-38464406	WT.replicate-2.bam	SKO.replicate-3.bam	OK	80.6485	26.5074	-1.60525	-7.46234	5e-05	0.0123202	yes
Nfkbiz	Nfkbiz	Nfkbiz	chr16:55811376-55838641	WT.replicate-2.bam	SKO.replicate-3.bam	OK	20.6704	9.92397	-1.05857	-4.13734	5e-05	0.0123202	yes
Nt5e	Nt5e	Nt5e	chr9:88327608-88372089	WT.replicate-2.bam	SKO.replicate-3.bam	OK	4.18327	17.5055	2.0651	6.81285	5e-05	0.0123202	yes
Pabpc4	Pabpc4	Pabpc4	chr4:123282910-123298835	WT.replicate-2.bam	SKO.replicate-3.bam	OK	11.7564	4.93488	-1.25236	-4.06703	5e-05	0.0123202	yes
Pmepa1	Pmepa1	Pmepa1	chr2:173224464-173276533	WT.replicate-2.bam	SKO.replicate-3.bam	OK	0.539139	2.73439	2.34249	5.5872	5e-05	0.0123202	yes
Prpsap1	Prpsap1	Prpsap1	chr11:116470815-116490346	WT.replicate-2.bam	SKO.replicate-3.bam	OK	28.0721	11.1688	-1.32967	-5.61982	5e-05	0.0123202	yes
Rpph1	Rpph1	Rpph1	chr14:50807446-50807771	WT.replicate-2.bam	SKO.replicate-3.bam	OK	704.466	315.685	-1.15805	-14.7515	5e-05	0.0123202	yes
Rtp4	Rtp4	Rtp4	chr16:23609918-23614222	WT.replicate-2.bam	SKO.replicate-3.bam	OK	17.4787	40.6796	1.21871	4.50955	5e-05	0.0123202	yes
Sec1	Sec1	Sec1	chr7:45677685-45694554	WT.replicate-2.bam	SKO.replicate-3.bam	OK	0	0.867253	inf	#NAME?	5e-05	0.0123202	yes
Skil	Skil	Skil	chr3:31095057-31122923	WT.replicate-2.bam	SKO.replicate-3.bam	OK	3.95969	12.9442	1.70884	6.75039	5e-05	0.0123202	yes
Smpd5	Smpd5	Smpd5	chr15:76294433-76307245	WT.replicate-2.bam	SKO.replicate-3.bam	OK	2.98642	11.9945	2.00588	7.05509	5e-05	0.0123202	yes
Tex11	Tex11	Tex11	chrX:100838647-101059639	WT.replicate-2.bam	SKO.replicate-3.bam	OK	0	0.76158	inf	#NAME?	5e-05	0.0123202	yes
Trp53inp1	Trp53inp1	Trp53inp1	chr4:11156440-11174377	WT.replicate-2.bam	SKO.replicate-3.bam	OK	1.57517	4.22725	1.42421	4.63794	5e-05	0.0123202	yes
Tsc22d1	Tsc22d1	Tsc22d1	chr14:76415820-76507766	WT.replicate-2.bam	SKO.replicate-3.bam	OK	2.2391	9.51354	2.08707	5.20056	5e-05	0.0123202	yes
Tsc22d3	Tsc22d3	Tsc22d3	chrX:140539528-140600522	WT.replicate-2.bam	SKO.replicate-3.bam	OK	79.3951	150.532	0.922948	4.10604	5e-05	0.0123202	yes
Xcl1	Xcl1	Xcl1	chr1:164931647-164935510	WT.replicate-2.bam	SKO.replicate-3.bam	OK	58.6099	186.574	1.67054	9.29743	5e-05	0.0123202	yes
Actb	Actb	Actb	chr5:142903115-142906724	WT.replicate-3.bam	SKO.replicate-3.bam	OK	12989.9	14433.3	0.15201	53.9823	5e-05	0.0123202	yes
Car2	Car2	Car2	chr3:14886425-14900770	WT.replicate-3.bam	SKO.replicate-3.bam	OK	49.4438	109.204	1.14317	5.37838	5e-05	0.0123202	yes
Ccl5	Ccl5	Ccl5	chr11:83525778-83530518	WT.replicate-3.bam	SKO.replicate-3.bam	OK	1931.31	757.562	-1.35014	-9.91762	5e-05	0.0123202	yes
Cd74	Cd74	Cd74	chr18:60803848-60812652	WT.replicate-3.bam	SKO.replicate-3.bam	OK	18.65	59.4429	1.67233	6.10075	5e-05	0.0123202	yes
Clec12a	Clec12a	Clec12a	chr6:129350243-129365303	WT.replicate-3.bam	SKO.replicate-3.bam	OK	0.508505	4.29327	3.07774	5.21051	5e-05	0.0123202	yes
Ctss	Ctss	Ctss	chr3:95526785-95556403	WT.replicate-3.bam	SKO.replicate-3.bam	OK	59.1381	114.836	0.95741	4.04901	5e-05	0.0123202	yes
Gimap7	Gimap7	Gimap7	chr6:48718620-48724636	WT.replicate-3.bam	SKO.replicate-3.bam	OK	126.999	48.344	-1.39341	-6.10302	5e-05	0.0123202	yes
Gpr68	Gpr68	Gpr68	chr12:100876681-100908198	WT.replicate-3.bam	SKO.replicate-3.bam	OK	18.03	39.4022	1.12787	4.65803	5e-05	0.0123202	yes
H2-Aa	H2-Aa	H2-Aa	chr17:34282750-34287771	WT.replicate-3.bam	SKO.replicate-3.bam	OK	7.21266	28.2088	1.96754	6.83391	5e-05	0.0123202	yes
H2-Q10	H2-Q10	H2-Q10	chr17:35470088-35474563	WT.replicate-3.bam	SKO.replicate-3.bam	OK	40.375	14.0699	-1.52085	-6.69573	5e-05	0.0123202	yes
Hmga1	Hmga1	Hmga1	chr17:27556573-27563672	WT.replicate-3.bam	SKO.replicate-3.bam	OK	238.984	99.1058	-1.26987	-4.36698	5e-05	0.0123202	yes
Ifitm1	Ifitm1	Ifitm1	chr7:140967428-140969827	WT.replicate-3.bam	SKO.replicate-3.bam	OK	323.756	1114.34	1.78321	7.97741	5e-05	0.0123202	yes
Ifitm2	Ifitm2	Ifitm2	chr7:140954838-140955961	WT.replicate-3.bam	SKO.replicate-3.bam	OK	62.6419	268.875	2.10174	11.8062	5e-05	0.0123202	yes
Ifitm3	Ifitm3	Ifitm3	chr7:141009589-141010744	WT.replicate-3.bam	SKO.replicate-3.bam	OK	46.1765	129.039	1.48258	7.93859	5e-05	0.0123202	yes
Igflr1	Igflr1	Igflr1	chr7:30565426-30567962	WT.replicate-3.bam	SKO.replicate-3.bam	OK	18.5926	44.9961	1.27507	5.64474	5e-05	0.0123202	yes
Il12rb2	Il12rb2	Il12rb2	chr6:67292017-67376137	WT.replicate-3.bam	SKO.replicate-3.bam	OK	6.78522	2.36891	-1.51817	-4.27538	5e-05	0.0123202	yes
Il7r	Il7r	Il7r	chr15:9506158-9529876	WT.replicate-3.bam	SKO.replicate-3.bam	OK	5.65046	13.1597	1.21968	3.76605	5e-05	0.0123202	yes
Isg20	Isg20	Isg20	chr7:78913764-78920396	WT.replicate-3.bam	SKO.replicate-3.bam	OK	21.0232	62.2162	1.56531	5.55169	5e-05	0.0123202	yes
Itgae	Itgae	Itgae	chr11:73090594-73147449	WT.replicate-3.bam	SKO.replicate-3.bam	OK	0.572725	9.97257	4.12205	6.72015	5e-05	0.0123202	yes
Klrk1	Klrk1	Klrk1	chr6:129610320-129623841	WT.replicate-3.bam	SKO.replicate-3.bam	OK	51.5402	26.918	-0.937126	-4.10074	5e-05	0.0123202	yes
Ldlrad4	Ldlrad4	Ldlrad4	chr18:67933256-68255549	WT.replicate-3.bam	SKO.replicate-3.bam	OK	0.656998	13.2366	4.3325	9.80743	5e-05	0.0123202	yes
Mgst2	Mgst2	Mgst2	chr3:51661192-51682675	WT.replicate-3.bam	SKO.replicate-3.bam	OK	14.2412	53.8464	1.91878	8.19407	5e-05	0.0123202	yes
Myc	Myc	Myc	chr15:61985340-61990361	WT.replicate-3.bam	SKO.replicate-3.bam	OK	51.1193	24.9793	-1.03313	-4.24269	5e-05	0.0123202	yes
Ncf4	Ncf4	Ncf4	chr15:78244810-78262580	WT.replicate-3.bam	SKO.replicate-3.bam	OK	104.662	329.047	1.65256	8.97014	5e-05	0.0123202	yes
Ndfip1	Ndfip1	Ndfip1	chr18:38418974-38464406	WT.replicate-3.bam	SKO.replicate-3.bam	OK	62.4057	26.5074	-1.23528	-5.70256	5e-05	0.0123202	yes
Nt5e	Nt5e	Nt5e	chr9:88327608-88372089	WT.replicate-3.bam	SKO.replicate-3.bam	OK	4.48901	17.5055	1.96334	6.59538	5e-05	0.0123202	yes
Pmepa1	Pmepa1	Pmepa1	chr2:173224464-173276533	WT.replicate-3.bam	SKO.replicate-3.bam	OK	0.373902	2.73439	2.87049	6.2728	5e-05	0.0123202	yes
Sell	Sell	Sell	chr1:164062075-164080785	WT.replicate-3.bam	SKO.replicate-3.bam	OK	34.7975	13.8205	-1.33217	-5.19328	5e-05	0.0123202	yes
Ski	Ski	Ski	chr4:155154074-155222535	WT.replicate-3.bam	SKO.replicate-3.bam	OK	1.8134	4.82509	1.41186	4.96018	5e-05	0.0123202	yes
Skil	Skil	Skil	chr3:31095057-31122923	WT.replicate-3.bam	SKO.replicate-3.bam	OK	3.13361	12.9442	2.0464	7.87631	5e-05	0.0123202	yes
Slc40a1	Slc40a1	Slc40a1	chr1:45908069-45925594	WT.replicate-3.bam	SKO.replicate-3.bam	OK	3.26836	8.23154	1.33259	3.96652	5e-05	0.0123202	yes
Smpd5	Smpd5	Smpd5	chr15:76294433-76307245	WT.replicate-3.bam	SKO.replicate-3.bam	OK	3.2328	11.9945	1.89152	6.58807	5e-05	0.0123202	yes
Tex11	Tex11	Tex11	chrX:100838647-101059639	WT.replicate-3.bam	SKO.replicate-3.bam	OK	0	0.76158	inf	#NAME?	5e-05	0.0123202	yes
Tnfrsf13c	Tnfrsf13c	Tnfrsf13c	chr15:82221743-82224336	WT.replicate-3.bam	SKO.replicate-3.bam	OK	14.7806	32.8194	1.15085	4.65733	5e-05	0.0123202	yes
Trp53inp1	Trp53inp1	Trp53inp1	chr4:11156440-11174377	WT.replicate-3.bam	SKO.replicate-3.bam	OK	1.85249	4.22725	1.19025	3.89476	5e-05	0.0123202	yes
Tsc22d1	Tsc22d1	Tsc22d1	chr14:76415820-76507766	WT.replicate-3.bam	SKO.replicate-3.bam	OK	2.85585	9.51354	1.73606	4.56401	5e-05	0.0123202	yes
Vcam1	Vcam1	Vcam1	chr3:116110019-116129688	WT.replicate-3.bam	SKO.replicate-3.bam	OK	2.04037	6.32589	1.63244	4.47753	5e-05	0.0123202	yes
Xcl1	Xcl1	Xcl1	chr1:164931647-164935510	WT.replicate-3.bam	SKO.replicate-3.bam	OK	56.1659	186.574	1.73198	9.49571	5e-05	0.0123202	yes
Actb	Actb	Actb	chr5:142903115-142906724	SKO.replicate-1.bam	SKO.replicate-3.bam	OK	15011.6	14433.3	-0.056682	-20.9162	5e-05	0.0123202	yes
Hmga1	Hmga1	Hmga1	chr17:27556573-27563672	SKO.replicate-1.bam	SKO.replicate-3.bam	OK	39.2072	99.1058	1.33785	4.22274	5e-05	0.0123202	yes
Id3	Id3	Id3	chr4:136143821-136145392	SKO.replicate-1.bam	SKO.replicate-3.bam	OK	54.0612	126.095	1.22185	7.53748	5e-05	0.0123202	yes
Pgls	Pgls	Pgls	chr8:71592183-71596267	SKO.replicate-1.bam	SKO.replicate-3.bam	OK	15.2619	40.3267	1.40181	7.22272	5e-05	0.0123202	yes
Tap2	Tap2	Tap2	chr17:34204478-34216321	SKO.replicate-1.bam	SKO.replicate-3.bam	OK	60.3092	118.44	0.973712	5.44418	5e-05	0.0123202	yes
Hist1h4d	Hist1h4d	Hist1h4d	chr13:23581601-23581913	SKO.replicate-2.bam	SKO.replicate-3.bam	OK	766.853	1941.68	1.34028	21.1991	5e-05	0.0123202	yes
Ifi27l2a	Ifi27l2a	Ifi27l2a	chr12:103442166-103443680	SKO.replicate-2.bam	SKO.replicate-3.bam	OK	651.129	1223	0.90941	6.80395	5e-05	0.0123202	yes
