# Supplementary material for: SMAD4 and TGFβ are architects of inverse genetic programs during fate determination of antiviral CTLs
Source: eLife. 2022 Aug 9;11:e76457. doi: 10.7554/eLife.76457 (PMC9402230; doi:10.7554/eLife.76457)
Supplement: Supplementary file 1. [file elife-76457-supp1.xlsx]

## Sheet: Sheet1
Sell-F	CTAATTTCCCCTCGCTCATTCAT
Sell-R	GCATTAGCTTCTGTGCTGAATTGA
Klf2-F	ACCAACTGCGGCAAGACCTA
Klf2-R	CATCCTTCCCAGTTGCAATGA
Hobit-F	CTCAGCCACTTGCAGACTCA
Hobit-R	CTGTCGGTGGAGGCTTTGTA
Klrg1-F	TTTGGGGCTTTTGACTGTGAT
Klrg1-R	TGTAAGGAGATGTGAGCCTTTGT
Itgae-F	GCCGTGATCCAGACTGAGTTTGAT
Itgae-R	ATGGCTGAGGCGGTCTTAGTGACT
Eomes-F	GCCTACCAAAACACGGATA
Eomes-R	TCTGTTGGGGTGAGAGGAG
Rpl9-F	CATCAACGTGGAGCTGAGTCTTC
Rpl9-R	GACCGCATCTTGTATCGGAAGC
