# Supplementary material for: SMAD4 and TGFβ are architects of inverse genetic programs during fate determination of antiviral CTLs
Source: eLife. 2022 Aug 9;11:e76457. doi: 10.7554/eLife.76457 (PMC9402230; doi:10.7554/eLife.76457)
Supplement: Supplementary file 2. [file elife-76457-supp2.xlsx]

## Sheet: IAV-Lungs
Fig 1A Lung	Comparisons with contols.
			D6	D8	D10	D15	D30
	KLRG1	TKO	<0.0001	<0.0001	<0.0001	<0.0001	<0.0001
		SKO	0.5865	<0.0001	<0.0001	<0.0001	0.0072
		STDKO	0.1471	<0.0001	<0.0001	<0.0001	0.0612
			D6	D8	D10	D15	D30
	CD62L	TKO	<0.0001	0.9998	0.9969	0.0019	0.9437
		S4KO	0.2461	0.0005	0.0057	0.1355	0.0003
		STDKO	0.401	<0.0001	0.0725	0.115	<0.0001
			D6	D8	D10	D15	D30
	CD103	TKO	0.4964	0.0161	<0.0001	<0.0001	<0.0001
		SKO	0.0056	0.0084	<0.0001	<0.0001	<0.0001
		STDKO	0.0109	<0.0001	<0.0001	<0.0001	<0.0001
Fig 1A Lung	S4KO Vs S4TR2DKO
		D6	D8	D10	D15	D30
	KLRG1	0.6403	0.2907	0.6108	0.0419	0.1907
	CD62L	<0.0001	0.2338	0.0087	0.919	0.5927
	CD103	0.1483	0.9462	0.0509	0.0639	0.0648

## Sheet: IAV-Spleen
Fig 1A spleen		Comparison with controls
			D6	D8	D10	D15	D30
	KLRG1	TKO	0.0003	<0.0001	<0.0001	<0.0001	<0.0001
		SKO	0.2841	<0.0001	<0.0001	<0.0001	<0.0001
		STDKO	0.0517	<0.0001	<0.0001	<0.0001	<0.0001
			D6	D8	D10	D15	D30
	CD62L	TKO	<0.0001	0.8634	0.1047	0.0832	0.993
		S4KO	0.038	0.0033	0.2824	0.0003	<0.0001
		STDKO	0.8727	0.0239	0.0499	0.0003	<0.0001
			D6	D8	D10	D15	D30
	CD103	TKO	0.0176	<0.0001	0.8318	0.9376	0.0985
		SKO	0.0624	<0.0001	<0.0001	<0.0001	<0.0001
		STDKO	<0.0001	<0.0001	<0.0001	<0.0001	<0.0001
Fig 1A spleen			S4KO Vs S4TR2DKO
		D6	D8	D10	D15	D30
	KLRG1	0.8298	0.9797	0.0005	0.9177	0.9977
	CD62L	0.0001	0.8916	0.8205	1	0.2476
	CD103	0.856	0.6244	0.1512	0.1926	0.0041

## Sheet: Listeria-spleen
	Fig 1B	Comparison with controls
			D5	D7	D14
	KLRG1	TR2KO	>0.9999	0.7471	0.041
		S4KO	0.008	<0.0001	<0.0001
		TR2S4KO	0.0016	<0.0001	<0.0001
			D5	D7	D14
	CD62L	TR2KO	0.0191	0.0406	0.0091
		S4KO	<0.0001	0.0008	<0.0001
		TR2S4KO	<0.0001	0.0024	<0.0001
			D5	D7	D14
	CD103	TR2KO	0.0125	0.0006	0.002
		S4KO	0.0088	<0.0001	<0.0001
		TR2S4KO	0.2796	<0.0001	<0.0001
