# Supplementary figures and images for: SMAD4 and TGFβ are architects of inverse genetic programs during fate determination of antiviral CTLs
Source: eLife journal article supplement (doi:10.7554/elife.76457), 2022-08-09

Figure 5 - figure supplement 3

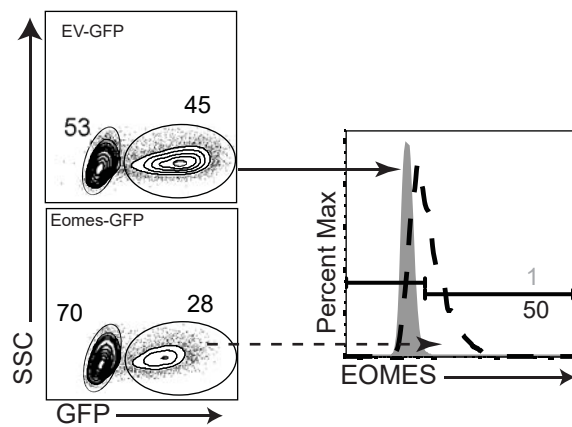

Supplement: supp [file elife-76457-supp-v1.zip]

Figure 5 - figure supplement 4

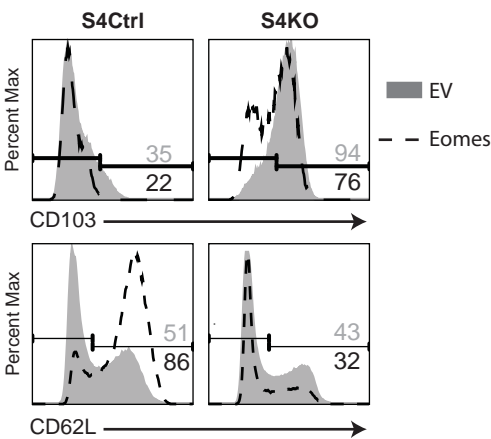

Supplement: supp [file elife-76457-supp-v1.zip]

Figure 5 - figure supplement 2

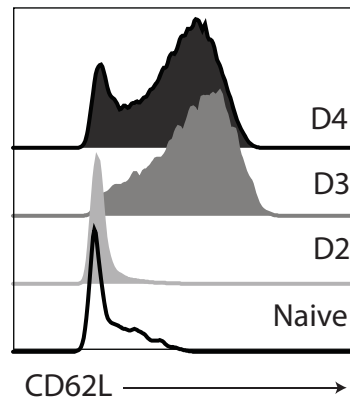

Supplement: supp [file elife-76457-supp-v1.zip]

Figure1-figure supplement 4

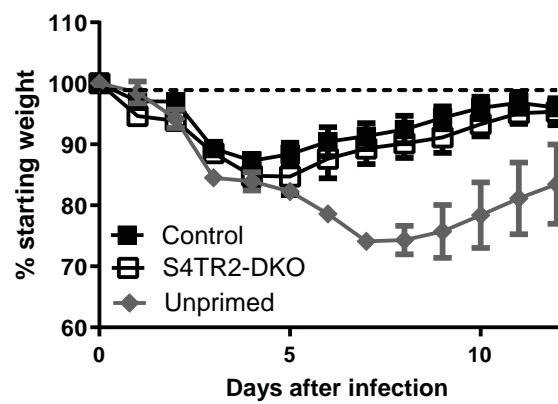

Supplement: supp [file elife-76457-supp-v1.zip]

Figure 4 - figure supplement 1

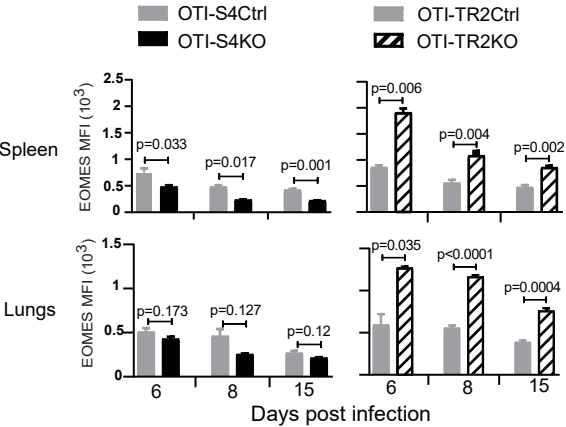

Supplement: supp [file elife-76457-supp-v1.zip]

Figure1-figure supplement 3

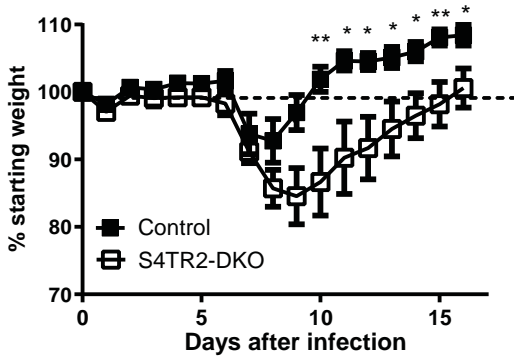

Supplement: supp [file elife-76457-supp-v1.zip]

Figure2 - figure supplement 1

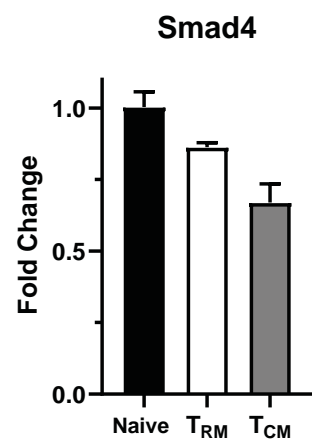

Supplement: supp [file elife-76457-supp-v1.zip]

Figure 5 - figure supplement 1

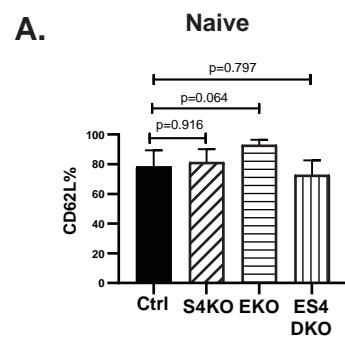

Supplement: supp [file elife-76457-supp-v1.zip]

Figure 5 - figure supplement 5

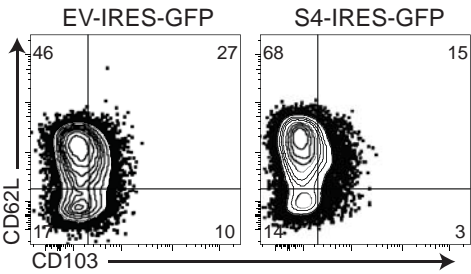

Supplement: supp [file elife-76457-supp-v1.zip]

Figure1-figure supplement 1

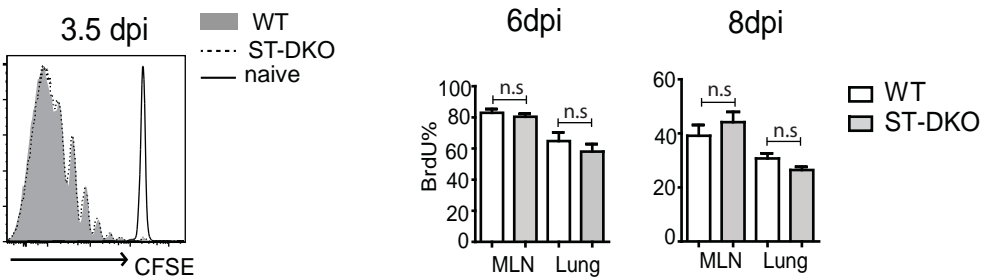

Supplement: supp [file elife-76457-supp-v1.zip]

Figure2-figure supplement 2

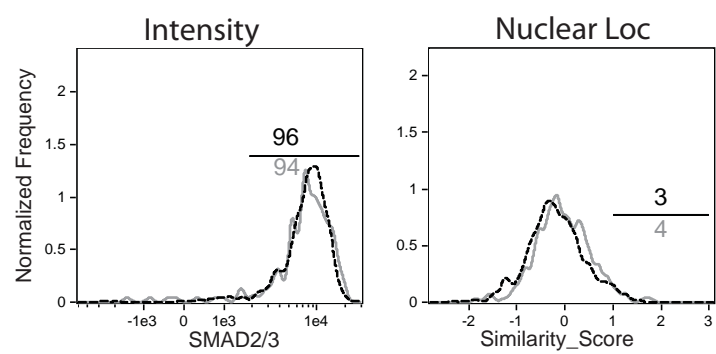

Supplement: supp [file elife-76457-supp-v1.zip]
